# A simple within-host, between-host model for a vector-transmitted disease

Mayra Núñez-López<sup>a,\*</sup>, Jocelyn A. Castro-Echeverría<sup>b</sup>, Jorge X. Velasco-Hernández<sup>b</sup>

<sup>a</sup>*Department of Mathematics, Instituto Tecnológico Autónomo de México, Río Hondo 1, 01080 Ciudad de México, Mexico,*

<sup>b</sup>*Instituto de Matemáticas UNAM Boulevard Juriquilla 3001 Juriquilla 76230 México*

---

## Abstract

We present a model that explicitly links the epidemiological Ross-Macdonald model with a simple immunological model through a virus inoculation term that depends on the abundance of infected mosquitoes. We explore the relationship between the reproductive numbers at the population (between-host) and individual level (within-host), in particular the role that viral load and viral clearance rate play in the coupled dynamics. Our model shows that under certain conditions on the strength of the coupling and the immunological response of the host, there can be sustained low viral load infections, with a within-host reproduction number below one that still can trigger epidemic outbreaks provided the between host reproduction number is greater than one. We also describe a particular kind of transmission-clearance trade off for vector-host systems with a simple structure.

*Keywords:* Vector-borne diseases; Multiple time scales; Between-host dynamics; Within-host dynamics; Transmission-clearance trade-off.

---

## 1. Introduction

Infectious disease dynamics integrates two key processes in the host-parasite interaction. One is the epidemiological process associated with disease transmis-

---

\*Corresponding author

*Email address:* [mayra.nunez@itam.mx](mailto:mayra.nunez@itam.mx) (Mayra Núñez-López)

sion, and the other is the immunological process of infection at the individual host level. The transmission of an infectious agent in a population involves various spatial and temporal scales. Specifically, these scales can be broken down into two major groups of phenomena: those that occur at the population scale (epidemic outbreaks) and those that occur within the host (pathogen-immune system interaction). There are a multiplicity of papers of a theoretical nature that have explored this interaction e.g., [1, 2, 3, 4, 5, 6, 7]. The vast majority of these works focus their analysis on directly transmitted diseases based on Kermack-McKendrick type models although there are some studies addressing vector-borne diseases [8, 9]. At the immune system level, the most widely used model, for theoretical purposes, is the one developed for HIV by, for example, [10] that differentiates between target cells, infected target cells, and virions. In particular [5, 6, 7] have looked at the problem of the interplay of between-host, within-host dynamics in an environmentally driven disease framing the equations at the population level as follows

$$\begin{aligned}S' &= \mu N - \beta SI - \mu S, \\I' &= \beta SI - \mu I, \\E' &= \theta Iv(1 - E) - \delta E\end{aligned}\tag{1}$$

and for the within-host dynamics:

$$\begin{aligned}T' &= \lambda - kvT - mT, \\T^{*'} &= kvT - (m + d)T^*, \\v' &= pT^* - cv + g(E).\end{aligned}\tag{2}$$

2 where  $S$ ,  $I$ , and  $E$  denote the susceptible, infectious and polluted environmental  
3 compartments with  $\mu$ ,  $\beta(v)$ ,  $\theta$  and  $\delta$  being the birth and mortality rate, the in-  
4 fection rate, the shedding rate from infected host deposited in the environment,  
5 and  $\delta$  the environmental degradation rate, respectively. For the within-host  
6 system,  $T$ ,  $T^*$  and  $v$  represent the target cells, infected target cells and virions  
7 respectively; as for the parameters  $\lambda$ ,  $k$ ,  $m$ ,  $d$ ,  $p$  and  $c$  represent the cell recruit-  
8 ment rate, cell infection rates, cell death rate, virion induced cell death rate,

9 virion production rate and virion clearance rate, respectively. The function  $g$   
10 represents the inoculum of virions coming from the contaminated environment  
11  $E$ . In general, it is assumed that  $g(E) = \xi_1 E^{\xi_2}$  for  $\xi_i > 0$  and  $\xi_2 \leq 1$  [5, 7].

12 Feng et al. [7], have generalized results regarding the evolution of virulence  
13 by introducing into the host infected class (Eq. 1) a disease-induced death rate.  
14 One of these results is that the evolution of virulence in the host population  
15 will favor a maximum level of virulence (at the between-host level) if virion  
16 production at the cellular level (within-host) is maximal ( $p$  in Eq. 2) or, alter-  
17 natively, will favor an intermediate level of virulence if the maximum rate of  
18 virion production is large.

19 In this paper we are interested in exploring between-host, within-host trade-  
20 offs in the context of a vector-borne disease in a vertebrate host. The aim of  
21 this article is theoretical. We are interested in exploring the coupled dynamics  
22 of within- and between-host dynamics in vector-host transmission systems. As  
23 mentioned above, [5, 7] have studied the interaction of these in an infectious dis-  
24 ease that has an environmental component represented in Eq. 1. It is through  
25 this component that the virus, when interacting with the contaminated envi-  
26 ronment, is inoculated in the host, thus linking transmission at the population  
27 level with infection at the individual level. Here we explore the same type of  
28 problem but replace the passive interaction between contaminated environment  
29 and host with an insect vector that actively seeks and infects the host. We  
30 restrict ourselves only to infection in the mammalian host and do not consider  
31 within-vector dynamics.

32 Vector-borne diseases are a group of diseases of great human importance  
33 with nearly half of the world's population infected with at least one type of  
34 vector-borne pathogen [11]. Diseases such as malaria, African trypanosomiasis,  
35 Chagas disease and Dengue fever, to mention just a few examples, are serious  
36 public health problems in many regions of the world, generating high levels of  
37 mortality and morbidity in at-risk populations, which are generally those with  
38 the least economic resources and with the least access to adequate public health  
39 systems [12]. On the other hand, arthropod-borne diseases are abundant in

40 vertebrates such as horses, cattle and other mammals. Climate change has a  
41 direct impact on arthropod vectors (abundance, geographical distribution, and  
42 vectorial capacity) [13, 14] producing a reemergence of many infectious diseases  
43 both in humans and animals of direct economic importance.

44 What we seek is to explore the fundamental relationship between reproduc-  
45 tive numbers at the population level, at the individual level and, in particular,  
46 the role of the within- and between-host system in the epidemic dynamics. As  
47 stated above, we postulate a model that explicitly links the epidemiological  
48 and immunological dynamics through an inoculation term that depends on the  
49 abundance of infected mosquitoes. This approach is based on the idea of sep-  
50 arating biological time scales: a fast time scale associated with the within-host  
51 dynamics and a slow time scale associated with the epidemiological process.  
52 One of the advantages of this approach is that the explicit linkage between the  
53 two processes can be established through infected mosquitoes: a bite from an  
54 infected mosquito inoculates into the host an extra viral load that connects,  
55 within our approach, the population dynamics with the within host dynamics  
56 of the disease.

## 57 **2. Model setup**

58 We couple the classical Ross-Macdonald model for a vector-host system cou-  
59 pled with the standard within-host model 2. Hosts are general vertebrate species  
60 and the vector is, in general, a mosquito. In the epidemiological model  $I$  repre-  
61 sents the number of infected vertebrate individuals and  $Y$  represents the number  
62 of infected mosquitoes. The variables  $T$  and  $T^*$  correspond to the immunolog-  
63 ical dynamics and represent uninfected and infected target cells, respectively,  
64 and  $v$  represents the virus concentration in plasma of an average infected ver-  
65 tebrate host;  $\mu$  and  $\delta$  represent mortality rates for the vertebrate and mosquito  
66 hosts and  $\gamma$  is the cure rate of vertebrate hosts. The parameters  $\alpha = \alpha(x)$  and  
67  $\beta = \beta(x')$  represent the effective contact rates from mosquito to animal and  
68 animal to mosquitoes and are assumed to depend, in general, on some measure

69 of infectiveness either in the mosquito or vertebrate host, respectively. The  
70 most common assumption for these functions [15, 16] is that for  $x, x' \in [0, \infty)$   
71 they satisfy  $\alpha(x), \beta(x') \geq 0$ ,  $\alpha'(x), \beta'(x') > 0$ , and  $\alpha''(x), \beta''(x') \leq 0$ . In our  
72 model (Eq. 3 below),  $\beta(x')$  is the biting rate that transmit the disease from an  
73 infected host with infectiousness  $x'$  to a susceptible mosquito. A hypothesis of  
74 our model is that the biting rate from the infected mosquito to a susceptible  
75 host,  $\alpha(x)$  will be proportional to  $\beta(x')$ . Some evidence supporting this hypoth-  
76 esis is in the work of Tesla et al. [17] who report that, for Zika, increasing viral  
77 dose in the blood-meal significantly increases the probability of mosquitoes be-  
78 coming infected and becoming infectious. This hypothesis simplifies our model  
79 because then we do not have to follow the fate of the viral load in the mosquito.  
80 In summary, the rationale of this assumption is that a high viral load in the  
81 vertebrate host will generate a high viral load infection in the mosquito that,  
82 in turn, will produce a high effective biting rate of infected mosquitoes to the  
83 vertebrate host. For the within-host system,  $\lambda$  represents the recruitment rate  
84 of healthy target cells,  $m$  the natural mortality rate of target cells,  $k$  the cell-  
85 infection rate,  $d$  the virus-induced cell death,  $p$  the virus proliferation rate per  
86 infected cell,  $c$  the viral clearance rate and  $g = g(y)$  is an inoculation term that  
87 depends on the abundance of infected mosquitoes  $y$ . Let  $\alpha(x) = ab(x)$  where  
88  $a$  is the biting rate and  $b(x)$  is the probability of vertebrate infection per bite;  
89 likewise,  $\beta(x') = a\phi(x')$  where  $\phi(x')$  is the probability of mosquito infection per  
90 bite. The equations for the between-host system are a variant of the so-called  
91 Ross-Macdonald equations:

$$\begin{aligned} I' &= \alpha(x) \left( \frac{N-I}{N} \right) Y - (\mu + \gamma)I, \\ Y' &= \beta(x')(M - Y) \frac{I}{N} - \delta Y, \end{aligned} \quad (3)$$

The equations for the within-host dynamics are now:

$$\begin{aligned} T' &= \lambda - kvT - mT, \\ T^{*'} &= kvT - (m + d)T^*, \\ v' &= pT^* - cv + g(y), \end{aligned} \quad (4)$$

92 where  $N$  and  $M$  stand for the total constant populations of vertebrate host and  
93 mosquito, respectively. Normalizing Eq. (3) by defining  $i = I/N$  and  $y = Y/M$ ,  
94 and defining  $q = M/N$  we can rewrite them as

$$\begin{aligned}i' &= \alpha(x)q(1-i)y - (\mu + \gamma)i, \\y' &= \beta(x')(1-y)i - \delta y,\end{aligned}\tag{5}$$

95 This is the epidemiological model that will be studied below. In order to link the  
96 abundance of infected mosquitoes with the infection process at the individual  
97 level, we assume that infected mosquitoes directly correlate with within-host  
98 level of infected target cells. This biological consideration suggest that the  
99 function  $g$  should have the following properties:  $g(y) \geq 0$ ,  $g(0) = 0$ ,  $g'(y) > 0$   
100 and  $g''(y) \leq 0$ .

101 In general, as in [5], we must take  $g(y) = ry^s$  with  $r, s > 0$ . In the next  
102 section we restrict our analysis to the case  $s = 1$  as our aim is to illustrate  
103 the framework of linking within- and between-host dynamics for viral load-  
104 dependent contact rates. The inclusion of the inoculation rate  $g(y)$  is key for  
105 linking the within-host dynamics to the between-host dynamics and replaces  
106 the environmental inoculum described in [5, 6, 7].

### 107 3. Model analysis

108 An important biological feature of this coupled system is that the within-  
109 host dynamics occurs on a faster time scale than the dynamics of the between-  
110 host and the environment. This multiple time-scale allows us to study the  
111 mathematical properties of the model by analyzing the fast- and slow-systems  
112 determined by the two time scales. As evidence that supports this analysis  
113 we can cite [18] who reports on the duration of DEN-1 viremia in a clinical  
114 study. According to this author, the duration of viremia ranged from 1 to 7  
115 days (mean, 4.5 days; median, 5 days) with viremias of primary infection lasted  
116 more compared to secondary infections: the mean duration of viremia for all  
117 patients experiencing a primary dengue virus infection was of 5.1 days versus

118 4.4 days for those with a secondary dengue virus infection. In contrast Dengue  
 119 outbreaks last several months or, in endemic situations, transmission takes place  
 120 over the years as reported in [19] or the statistics provided by PAHO, among  
 121 many other sources. We would like to decouple model (3, 4) with respect to  
 122 time. As done in [5, 6, 7] we would like to separate slow and fast subsystems  
 123 corresponding to either of the between-host (epidemiological) or the within-host  
 124 (immunological) models.

### 125 3.1. Summary of results for the fast subsystem

The fast system has been analyzed by [5, 7] for the case of an environmentally-driven infectious disease. Their results have immediate applicability to our case. In this subsection we briefly summarize them. The within-host dynamics (4) can be considered the fast system where the variable  $y$  can be treated as a constant (i.e. it is not changing with time on the fast time scale). In our case (Eq. 4) when  $g(y) = 0$ , the system always has the infection-free equilibrium  $E_0 = (T_0, T_0^*, v_0)$  where  $T_0 = \frac{\lambda}{m}$ ,  $T_0^* = 0$ ,  $v_0 = 0$ . Let  $R_v(y)$  denote the within-host reproduction number, which is a function of the density of infected mosquitoes, and define  $R_{0v} = R_v(0)$  given by

$$R_{0v} = \frac{\lambda kp}{mc(m+d)}$$

as the basic reproduction number of the uncoupled fast (within-host) system. As in Feng et al. [6],  $R_v(y)$  when  $y > 0$  is given by

$$R_v(y) = \frac{T_0}{T_{eq}(y)} \quad (6)$$

where we take the biological feasible solution to be (cf Feng et al. [6]):

$$T_{eq}(y) = \frac{1}{2} \left( a_1 - \sqrt{a_1^2 - 4a_2} \right) \quad (7)$$

with

$$a_1 = \frac{g(y)(m+d)}{pm} + T_0 \left( 1 + \frac{1}{R_{0v}} \right), \quad a_2 = \frac{T_0^2}{R_{0v}}. \quad (8)$$

126  $R_{0v}$ , the within-host reproduction number does not depend on  $y$  but the repro-  
 127 ductive function  $R_v(y)$  depends on the magnitude of  $R_{0v}$ . Such a dependence is

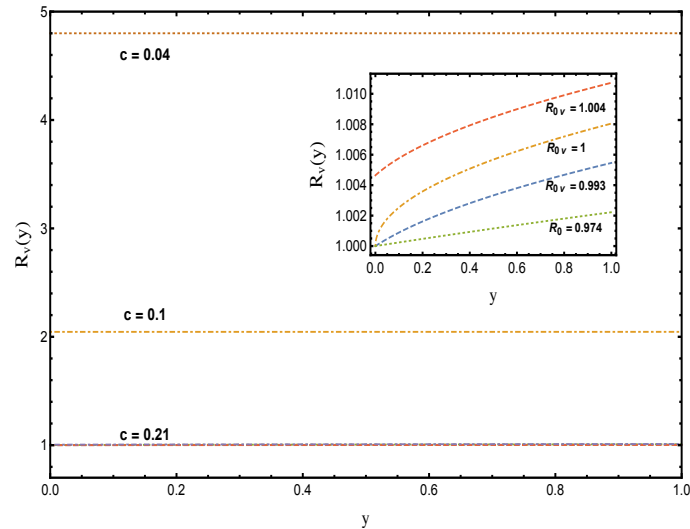

Figure 1: Within-host reproduction number  $R_v(y)$  as functions of vector prevalence  $y$ . Parameters  $\lambda = 5000$ ,  $m = 0.311$ ,  $d = 0.01$ ,  $p = 10^4$ ,  $r = 10000$ ,  $k = 4.08410^{-10}$ .

128 illustrated in Fig 1. This figure plots the curves  $R_v(y)$  for different  $R_{0v}$  values,  
 129 where we have used a linear function for  $g(y) = ry$  with  $r$  constant. Following  
 130 Feng et al. [6], we know that given  $R_{0v} > 1$ ,  $\lim_{y \rightarrow 0} R_v(y) = R_{0v}$ ; otherwise if  
 131  $R_{0v} < 1$ , then  $\lim_{y \rightarrow 0} R_v(y) = 1$  (see the upper right corner of Fig. 1).  $E_0$  is  
 132 locally asymptotically stable if  $R_{0v} < 1$  and unstable if  $R_{0v} > 1$ .

133 In Appendix A, we present the global stability of the disease-free equilibrium  
 134 point  $E_0$  with  $g(y) = 0$  for the within-host dynamics.

135 There exists a unique endemic equilibrium  $E_f = (i^*, y^*)$  with  $i^* > 0$ ,  $y^* > 0$  of  
 136 the fast system if and only if  $R_{0v} > 1$ . Following [5] the endemic equilibrium  
 137  $E_f$  is locally asymptotically stable whenever  $R_{0v} > 1$ .

### 138 3.2. The slow subsystem

Let  $x' = T^*(t)/T_0$ , the proportion of infected target cells at time  $t$ , a measure  
 of the infectiousness of the vertebrate host. Let

$$\beta(x') = a\phi(x'), \quad \phi(x') = (x')^z$$



with  $0 < z$  and  $a > 0$ , the biting rate. In the case of vertebrate infections, these depend on the infectiousness of the mosquito bite. Since we are not following the within-mosquito dynamics, we will let  $b$ , the probability of infection from mosquito to vertebrate host to be a free parameter. The basic reproduction number is then

$$R_b(x') = \sqrt{\frac{a^2 b q \phi(x')}{(\gamma + \mu) \delta}}. \quad (9)$$

Note that if  $x' = 1$  then

$$R_b(1) = \sqrt{\frac{a^2 q b \phi(1)}{(\gamma + \mu) \delta}},$$

is the maximum biologically feasible reproduction number as a function of host infectiousness  $x'$ . When  $R_b(x') > 1$ , the (between-host) endemic equilibrium point can exist and be found explicitly:

$$i^* = \frac{\delta(\gamma + \mu)(R_b^2(x') - 1)}{a\phi(x')(qab + \gamma + \mu)}, \quad y^* = \frac{\delta(\gamma + \mu)(R_b^2(x') - 1)}{qab(a\phi(x') + \delta)}.$$

Both of these coordinates depend on  $x'$  and will render the between-host endemic equilibrium only when  $x'_* = \hat{T}^*/T_0$ , the equilibrium infected target cell infection. An alternative way of looking at the between-host endemic equilibrium is the following. The endemic equilibrium point (slow subsystem)  $(i^*, y^*)$  is located on the intersection of the zero isoclines of the between-host equations (for constant within-host dynamics). Explicitly, these are

$$y = \frac{a\phi(x')i}{a\phi(x')i + \delta}, \quad y = \frac{i(\gamma + \mu)}{q(1 - i)}ab \quad (10)$$

139 The intersection exists with positive  $i$  whenever  $R_b(x') > 1$  which is the stan-  
 140 dard condition for the existence of an endemic equilibrium point in the Ross-  
 141 Macdonald model. However, in this case, our equilibrium will be located on the  
 142 line that describes this intersection as function of the parameter  $x'$  (see Figure  
 143 2) and it will be determined when  $x' = x'_*$  implying that  $R_b(x'^*) = R_{0b} \leq R_b(1)$ ,  
 144 i.e., the between-host basic reproduction number is bounded by the maximum  
 145 of the between-host reproduction function. We now proceed to characterize the  
 146 within-host endemic equilibrium, particularly how its state variables depend on  
 147 the (population level) mosquito abundance. In this, we follow Feng et al. [5].

148 The epidemiological and within-host subsystems are linked through the abun-  
 149 dance of infected mosquitoes in terms of  $R_v(y)$  (Eq. 6). Assume  $R_v(y) > 1$  and  
 150 that the fast system is at its stable nontrivial equilibrium  $(T_{eq}(y), T_{eq}^*(y), v^*(y))$   
 151 given by (6, 7 and 8), where  $v^*(y) = \frac{1}{c} \left[ g(y) + \frac{p\lambda}{m+d} \left( 1 - \frac{1}{R_v(y)} \right) \right]$ ,  $R_v(y)$  is  
 152 indicated in Appendix B.

Note that

$$v^*(0) = m(R_{0v} - 1)/k > 0$$

when  $R_{0v} > 1$ . The viral load at equilibrium depends now on  $y$  and to have  
 $v^*(y) > 0$ , it is required that the within-host reproduction function  $R_v(y) =$   
 $2Q > 1$  where

$$Q = \left( R_{0v} + 1 + \frac{kr}{cm}y - \sqrt{\Delta} \right)^{-1}$$

and

$$\Delta = \left( R_{0v} + 1 + \frac{kr}{cm}y \right)^2 - \frac{4}{R_{0v}}.$$

153 Biological feasibility dictates that  $\Delta, Q > 0$ . This is satisfied if  $R_{0v} > 1$  since  
 154  $R_v(y)$  is an increasing function of  $y$ .

#### 155 4. Linking time scales

The Jacobian of the whole coupled system is

$$J_{BW} = \begin{pmatrix} -c - \mu - abqy & ab(1-i)q & 0 & 0 & 0 \\ a(1-y) \left( \frac{T^*m}{\lambda} \right)^z & -ia \left( \frac{T^*m}{\lambda} \right)^z - \delta & 0 & aim(1-y)z \frac{\left( \frac{T^*m}{\lambda} \right)^{z-1}}{\lambda} & 0 \\ 0 & 0 & -kv - m & 0 & -kT \\ 0 & 0 & kv & -d - m & kT \\ 0 & r & 0 & p & -c \end{pmatrix}$$

At the disease-free equilibrium  $E_0 = (0, 0, \lambda/m, 0, v^*(0))$  the Jacobian is

$$J_{BW_{E_0}} = \begin{pmatrix} -c - \mu & abq & 0 & 0 & 0 \\ 0 & -\delta & 0 & 0 & 0 \\ 0 & 0 & -kv - m & 0 & -kT \\ 0 & 0 & kv & -d - m & kT \\ 0 & r & 0 & p & -c \end{pmatrix}$$

156 Note from  $J_{BW_{E_0}}$  that the components of the between-host reproduction num-  
157 ber, namely the biting rates, play a role on the stability of  $E_0$  through the  
158 proportion of infected target cells  $T^*m/\lambda$  once the within-host infections starts  
159 to grow when  $R_{0v} > 1$ . Also, since this condition implies that  $\lim_{y \rightarrow 0} v(y) > 0$   
160 then necessarily  $\lim_{y \rightarrow 0} T^*(y) > 0$  too.

## 161 5. Conditions for a disease outbreak

### 162 5.1. The epidemic system

163 The existence of an epidemic outbreak depends on the strength of the infec-  
164 tion at the within-host level measured by the within-host reproduction number  
165 when  $R_{0v} > 1$ . The between-host reproduction number  $R_b(x')$  will be greater  
166 than one only until enough infection has accumulated so as to sufficiently in-  
167 crease the ratio  $x'(t) = T^*(t)m/\lambda$ . When  $0 < R_b(x') < 1$  the only between-host  
168 equilibrium point that exists is the disease-free equilibrium which is asymptot-  
169 ically stable.  $R_b(x') > 1$  requires the average individual in the population to  
170 have an active (within-host) viral infection but the transmission efficacy will  
171 not be large enough so as to trigger an epidemic until  $R_b(x') = R_{0b}$ . We can  
172 give a more detailed description of the dependence of the between-host equilib-  
173 rium state and the within-host dynamics. First, there exists a critical value of  
174  $T^* = \hat{T}_*$  where  $R_b(\hat{T}_*) = 1$ . In Figure 2 we plot the intersection of Eq. (10) to  
175 show how the existence of an endemic equilibrium depends on  $T^*$  and  $i$ . As  $T^*$   
176 increases above  $\hat{T}_*$ , the boundary between the two colored regions shown in the  
177 figure is the line that contains the feasible endemic equilibrium that is realized  
178 when  $T^*$  reaches its steady-state. A second important feature is associated with  
179 the contact rate  $\beta(x') = a\phi(x')$ , where  $\phi(x') = (x')^z$ . Figure 3 shows the inter-  
180 section of the two isoclines Eq (10) that give the feasible endemic equilibrium  
181 but as functions of  $x'$  and  $z$ , the exponent of the probability of infection  $\phi(x')$ .  
182 Large values of  $z$  prevent the existence of an endemic between-host equilibrium  
183 point, whereas for  $z \leq 1$  the endemic equilibrium always exist. So concave prob-  
184 abilities of infection always generate an endemic state provided  $R_{b0} > 1$  while

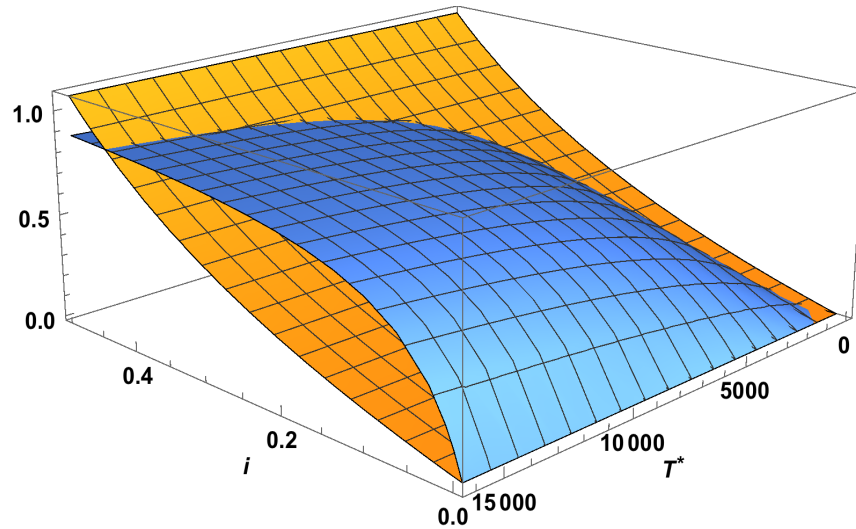

Figure 2: 3D representation of the zero-isoclines for the between-host model as a function of  $x'$ , the proportion of infected target cells.  $x$ -axis is  $i$ ,  $y$  axis is  $T^*$  with  $z = 0.8$ . The blue shaded region describes the dynamic transcritical bifurcation that appears after  $T^*$  reaches the critical value such that  $R_b(T^*) = 1$ .

185 convex ones do not. A third observation is that we can expect a time-delay of  
 186 variable duration occurring between the crossing of the threshold  $R_b(T^*) = 1$   
 187 and the time when the epidemic outbreak will occur and will send the between-  
 188 host system to its endemic state, i.e., when  $R_b(T^*) = R_0$ . This delay appears  
 189 because of the dynamic nature of our contact rate parameters that depend on  
 190 the within-host dynamics.

### 191 5.2. The full coupled system

We look now at the role of virulence, measured by our variable  $x'$ , on the dynamics of our system. First, we make the reasonable assumption that the recovery rate  $\gamma$  is related to the viral clearance rate  $c$  in a very specific way. We postulate that the recovery rate is not constant but satisfies

$$\gamma(x') = c(1 - x'),$$

implying that large virulence is associated with chronic disease with practically no recovery, and low virulence makes the recovery rate  $\gamma$  approximately equal

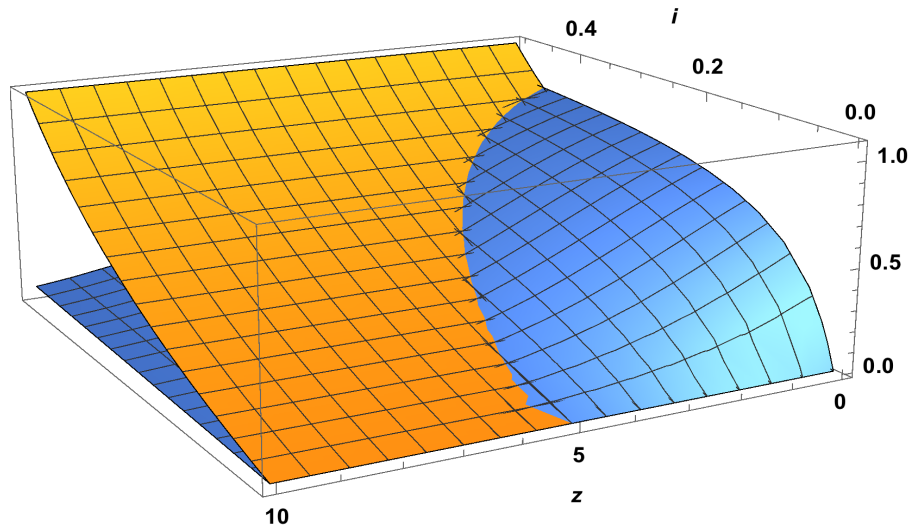

Figure 3: 3D representation of the zero-isoclines for the between-host model as a function of  $x'$ , the proportion of infected target cells.  $x$ -axis is  $i$ ,  $y$  axis is  $z$ . The blue shaded region describes the transcritical bifurcation that appears after  $T^*$  reaches the critical value such that  $R_b(T^*) = 1$ .

to the clearance rate  $c$ . Recall that  $R_b(x')$  is given by Eq. (9). The endemic equilibrium for the host population, on the other hand, has the formula

$$i^* = \frac{\delta(c(1-x') + \mu)x'^{-z}}{a(aq + c(1-x') + \mu)}(R_b^2(x') - 1).$$

192 We can easily prove that, as a function of  $x'$ ,  $i^*(x')$  is a monotonically increasing  
 193 function, and that  $R_b(x')$  is concave, if  $z < 1$  and convex if  $z > 1$ . Also  $i^*$  is  
 194 biologically feasible only for  $x' > x'_*$  where  $x'_*$  is the proportion of infected target  
 195 cells that results in  $R_b(x'_*) = 1$ . Moreover, for the same value of  $x'$ , transmission  
 196 probabilities with  $z > 1$  produce lower levels of endemicity than for  $z < 1$ . The  
 197 temporal dynamics of the coupled system is depicted in (Table 1 top to bottom).  
 198 In all these simulations, we are assuming that the recovery rate of infected  
 199 individuals is of the form  $\gamma(x') = c(1-x')$  with  $x' = T^*/T_0$  and, also, we have  
 200 set the baseline clearance rate to  $c = 0.14$  or, equivalently, a duration of viremia  
 201 lasting 7 days. Seven days is then, the shortest recovery time. Since we are using  
 202 the same within-host parameters in all runs, the behavior of  $x'$  in all cases is the

203 same as can be seen in Table 1b. The observed delay in the onset of the epidemic  
204 (Table 1a) at the between-host level is associated with the particular shape of the  
205 probability of infection  $\phi(x') = (x')^z$  (see Eq.9) from mosquito to host and the  
206 ratio of mosquito numbers to host numbers. The rows of Table 1 correspond  
207 to different values of the parameter  $z$ . Top and middle rows correspond to  
208  $z < 1$  and the bottom row to  $z = 1$ . We can see that for the same within-host  
209 dynamics, slowly growing transmission probabilities (Table 1 top row) provide  
210 a earlier outbreak than faster growing ones (Table 1 middle row). However,  
211 this effect can be modified by the magnitude of the product  $bq = bM/N$  the  
212 effective ratio of mosquito to host (Table 1 bottom row). Table 1c shows the  
213 relative magnitud of the within-host (constant) reproduction number and the  
214 between-host reproduction function as  $x'$  changes. Finally, Table 1d shows that  
215 when  $R_b(x') < R_{0v}$  the mosquito infection at the population level, is slower  
216 than the infection of target cells (middle and bottom rows). If  $R_b(x') > R_{0v}$   
217 the above condition still holds but both time scales are then very similar.

218 Finally, looking closer to the clearance rate  $c$  we can say that, in general  
219  $0 < c_* \leq c \leq c^*$  where  $c^*$  is the value of  $c$  for which  $R_{0v} = 1$ . As  $c \rightarrow 0$   
220 the within-host reproduction number  $R_{0v}$  tends to infinity but  $R_v(y)$  ceases to  
221 be a real number and the ODE system breaks down. In summary, the upper  
222 bound is determined solely by the within-host dynamics  $R_{0v}$ , but a very large  
223 residence time  $1/c$  is biologically unfeasible given the mathematical model we are  
224 proposing. Table 2 shows how  $R_{0v}$ ,  $v^*(y)$  and  $R_v(y)$  depend on the parameter  
225  $c$ . We have arbitrarily selected three regions in this curves. It is clear that large  
226 or intermediate values of  $c$  (as described in the figure caption) are biologically  
227 feasible giving a reasonable magnitude range for the within-host reproduction  
228 number (e.g.,  $R_{0v} < 4$ ). A large  $c$  describes a short viremia period while a small  
229  $c$  describes a long one. Our results thus indicate that, for the kind of interaction  
230 described by our model, short or intermediate viremia duration are biologically  
231 more feasible than long ones. On the other hand, very short viremias render  
232  $R_{0v} < 1$  and the whole coupled system breaks down (mathematically, solution  
233 no longer exist).

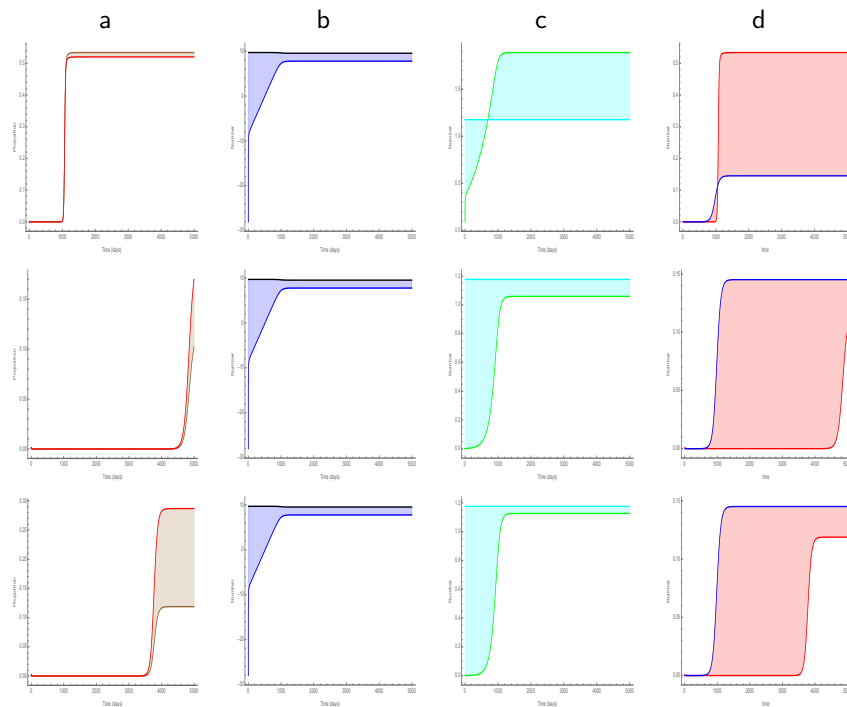

Table 1: Dynamic behaviour of the full within-host, between-host model. Parameters for the within-host system are as in Table 2. For the between-host system,  $a = 0.162$ ,  $\gamma = c = 0.14$  and  $\delta = 0.05$ . Rows correspond to different values of  $z$ . Top,  $z = 0.2$ , middle  $z = 0.8$  both with  $q = 1.5$  mosquitoes per host; and bottom  $z = 1$  with  $q = 2.5$  mosquitoes per host. Columns show a) the prevalence of infected mosquitoes (brown) and vertebrate hosts (red); b) in logarithmic scale the density of naive (black) and infected (blue) target cells, c) the within-host reproduction number  $R_{0v}$  (cyan), the between-host reproduction function  $R_b(x')$  (green); d) the proportion of infected target cells  $x'$  (blue) and the proportion of infected mosquitoes  $i$  (red).

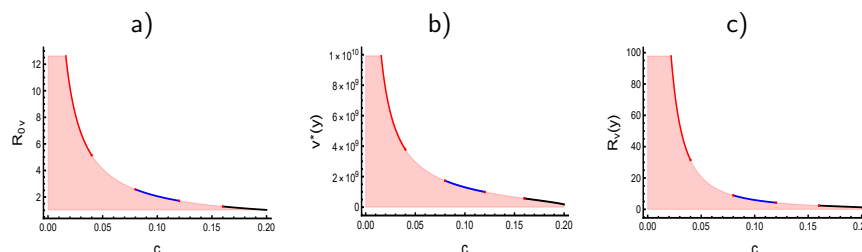

Table 2: Key within-host functions and their dependence on  $c$ , the clearance rate. Parameters are  $k = 4.08410^{-10}$ ,  $\lambda = 5000$ ,  $m = 0.311$ ,  $d = 0.01$ ,  $p = 10^4$ ,  $r = 10000$ . For these particular parameters,  $c^* \approx 0.205847$ . The colored segments represent examples of clearance rates of short duration (black), medium duration (blue) and long duration (red). To the left of the blue region, the values of all of these functions are biologically unfeasible. (a) Within-host reproduction number  $R_{0v}$ ; (b) Approximate viral load function  $v^*(y)$ ; (c) Reproduction function  $R_v(y)$ , Eq.(6)

234 The within-host and between-host population processes are closely coupled  
 235 as can be seen in the timing where equilibria for both subsystems is reached  
 236 (Table 1 columns a, b and d). However, the between-host reproduction function  
 237 approaches its limit  $R_b(T^*)$  at different speeds depending on the magnitude of  
 238  $z$ . The epidemic outbreak will be triggered when the within-host system reaches  
 239 its equilibrium state regardless of how large is the within-host infection while  
 240 approaching it. So, our model indicates that transmission at the population  
 241 level is feasible but cannot be realized until the average infection conditions of  
 242 individuals reach their corresponding equilibrium. Therefore, the reproduction  
 243 number of the between-host system is an indicator of an epidemic outbreak that  
 244 will be occurring later in time, depending upon the magnitude of  $T^*$ . This is  
 245 one of the explicit links of the population level reproduction number and the  
 246 dynamics of the within-host infection.

## 247 6. Conclusion

248 The dynamics of infections diseases is driven by two processes: the epi-  
 249 demiological process occurring at the population level and the immunological



250 process within the host. Many existing models in the context of a vector-borne  
251 disease, approach these two process as decoupled systems. In this paper we  
252 have linked them using a simple model based on two classical well-known equa-  
253 tions: the Ross-Macdonald model and a basic virus-cell interaction model. We  
254 demonstrate our framework by using as a simplified model system for a general  
255 vector-borne disease in a vertebrate host. Naturally, in these diseases the vec-  
256 tor plays a major and determinant role in transmission. This model produces  
257 a clearance-transmission trade-off where viral load is an increasing function of  
258 viremia duration. This results is contrary to the results on Dengue reported  
259 by [20], where short viremias have larger viral loads than long viremias. Due  
260 to the way the within-host dynamics is modelled and the resulting form that  
261 the within-host reproduction number takes, large  $c$  (short viremias) reduce the  
262 magnitude of the reproductive number and therefore, generate lower viremias  
263 than when  $c$  is small (long viremias). For Dengue disease, [20] use a more de-  
264 tailed model carefully adapted to Dengue viral dynamics that is able to capture  
265 dynamical characteristics that our simple model cannot achieve. Our simple  
266 model does not consider any specific mechanisms of activation of the innate and  
267 adaptive immune responses and thus our results cannot directly be compared  
268 to those in [20]. However, results on malaria [21] may seem to agree with the  
269 relation of clearance and pathogen load that our model produces. In this work  
270 it is clear that the length of pathogen clearance time is positively associated  
271 with higher concentrations of parasites. For Zika, [22] reports relatively long  
272 viremias in whole blood samples in human hosts, of more than 26 days, while  
273 in macaques [23], the highest viremia was reported for intermediate duration  
274 (in macaques the viremia length ranges from 2 to 7 days); for Chikungunya,  
275 [24], the higher frequency of high viremia in human hosts occurred also on the  
276 7 day of symptom onset (symptom onset occurs in the interval 1-20 in this  
277 study). The model we develop and analyze in this work integrates in a simple  
278 and direct manner, the interplay of epidemiological dynamics and within-host  
279 immune-virus interaction dynamics. The model focuses in a general, classical  
280 approach to approximating the dynamics of vector-borne diseases and immune

281 system dynamics on vertebrate hosts. The conclusions therefore, are also of a  
282 general nature and only describe broad patterns of interaction.

### 283 **Acknowledgements**

284 MNL acknowledges the financial support from the Asociación Mexicana de  
285 Cultura, A.C.; JACE and JXVH acknowledge support from grants UNAM PA-  
286 PIIT IN115720 and IV100220. JXVH developed part of this work during his  
287 sabbatical year at Departamento de Matemáticas ITAM and the Simons Institute,  
288 University of Berkeley. For his stay at the latter, support from PASPA-UNAM  
289 fellowship is acknowledged.

### 290 **Appendix A**

291 *Global stability of the disease-free equilibrium point  $E_0 = (T_0, T_0^*, v_0)$  for the*  
292 *within-host dynamics (fast subsystem) given by system (4) with  $g(y) = 0$ .*

293

294 Let  $c(d + m) > kp(\frac{\lambda}{m})$ , i.e.  $R_{0v} < 1$  and  $S_0 = \frac{p}{d+m}$ , then the critical point  
295  $E_0$  is globally asymptotically stable.

In order to prove the asymptotic stability of  $E_0$ , consider the Lyapunov  
function

$$\mathcal{U}(T, T^*, v) = T_0 \left( \frac{T}{T_0} - \ln \frac{T}{T_0} \right) + T^* + \frac{v}{S_0} = T - T_0 \ln(T) + T_0 \ln(T_0) + T^* + \frac{v}{S_0}.$$

296 Then from the last expression

$$\begin{aligned}
 \frac{d\mathcal{U}}{dt} &= T' - \frac{T}{T_0}T' + T^{*'} + \frac{1}{S_0}v' \\
 &= \lambda - kTv - mT - \frac{T_0}{T}(\lambda - kTv - mT) + kTv - (d+m)T^* + \\
 &\quad \frac{1}{S_0}(pT^* - cv) \\
 &= \lambda - mT - \frac{T_0}{T}\lambda + kT_0v + mT_0 - (d+m)T^* \\
 &\quad - \frac{1}{S_0}(cv) + \frac{1}{S_0}pT^* \\
 &= \lambda + mT_0 - \frac{T_0}{T}\lambda - mT + kT_0v - (d+\delta_2)T^* \\
 &\quad - \frac{1}{S_0}(cv) + \frac{1}{S_0}pT^*
 \end{aligned}$$

297 Substituting  $mT_0 = \lambda$  in the second term,  $m = \lambda/T_0$  in the fourth term and

298  $S_0 = p/(d+m)$  in the last one we get

$$\begin{aligned}
 \frac{d\mathcal{U}}{dt} &= \lambda \left( 2 - \frac{T_0}{T} - \frac{T}{T_0} \right) + kT_0v - (d+m)T^* \\
 &\quad - \frac{1}{S_0}(cv) + (d+m)T^* \\
 &= \lambda \left( 2 - \frac{T_0}{T} - \frac{T}{T_0} \right) + kT_0v - \frac{1}{S_0}(cv)
 \end{aligned}$$

299 A further simplification yields

$$\frac{d\mathcal{U}}{dt} = \lambda \left( 2 - \frac{T_0}{T} - \frac{T}{T_0} \right) + \left( kT_0 - \frac{c}{S_0} \right) v < 0$$

300 The last inequality follows from the hypothesis and the inequality of the geo-  
 301 metric and arithmetic means.

## 302 Appendix B

303 Here we give the full expression of the within-host reproduction function

304  $R_v(y)$  that appears in expression  $v^*(y)$

$$R_v(y) = \frac{2T_0}{T_0(R_{0v} + 1) + \frac{(d+m)ry}{mp} - \sqrt{\left( T_0(R_{0v} + 1) + \frac{(d+m)ry}{mp} \right)^2 - \frac{4T_0^2}{R_{0v}}}$$

305 **Author's contributions**

306 JXVH conceived the project; MNL, JACE and JXVH performed the analy-  
307 ses. MNL and JXVH wrote the manuscript. All authors discussed and revised  
308 the manuscript.

309 **Bibliography**

310 [1] M. A. Gilchrist, A. Sasaki, Modeling host–parasite coevolu-  
311 tion: A nested approach based on mechanistic models, *Jour-  
312 nal of Theoretical Biology* 218 (3) (2002) 289–308. doi:<https://doi.org/10.1006/jtbi.2002.3076>.  
313

314 URL [https://www.sciencedirect.com/science/article/pii/  
315 S0022519302930766](https://www.sciencedirect.com/science/article/pii/S0022519302930766)

316 [2] M. A. Gilchrist, D. Coombs, Evolution of virulence: Interde-  
317 pendence, constraints, and selection using nested models, *Theo-  
318 retical Population Biology* 69 (2) (2006) 145–153. doi:<https://doi.org/10.1016/j.tpb.2005.07.002>.  
319

320 URL [https://www.sciencedirect.com/science/article/pii/  
321 S0040580905000961](https://www.sciencedirect.com/science/article/pii/S0040580905000961)

322 [3] N. Mideo, S. Alizon, T. Day, Linking within- and between-  
323 host dynamics in the evolutionary epidemiology of infectious  
324 diseases, *Trends in Ecology Evolution* 23 (9) (2008) 511–517.  
325 doi:<https://doi.org/10.1016/j.tree.2008.05.009>.

326 URL [https://www.sciencedirect.com/science/article/pii/  
327 S0169534708002188](https://www.sciencedirect.com/science/article/pii/S0169534708002188)

328 [4] A. E. S. Almcera, V. K. Nguyen, E. A. Hernandez-Vargas, Multiscale  
329 model within-host and between-host for viral infectious diseases, *Jour-  
330 nal of Mathematical Biology* 77 (4) (2018) 1035–1057. doi:[10.1007/  
331 s00285-018-1241-y](https://doi.org/10.1007/s00285-018-1241-y).

332 URL <https://doi.org/10.1007/s00285-018-1241-y>

- 333 [5] Z. Feng, J. Velasco-Hernandez, B. Tapia-Santos, M. C. A. Leite, A model  
334 for coupling within-host and between-host dynamics in an infectious dis-  
335 ease, *Nonlinear Dynamics* 68 (3) (2012) 401–411.
- 336 [6] Z. Feng, J. Velasco-Hernández, B. Tapia-Santos, A mathematical model for  
337 coupling within-host and between-host dynamics in an environmentally-  
338 driven infectious disease, *Mathematical Biosciences* 241 (1) (2013) 49–55.  
339 doi:<https://doi.org/10.1016/j.mbs.2012.09.004>.  
340 URL [https://www.sciencedirect.com/science/article/pii/  
341 S0025556412001836](https://www.sciencedirect.com/science/article/pii/S0025556412001836)
- 342 [7] Z. Feng, X. Cen, Y. Zhao, J. X. Velasco-Hernandez, Cou-  
343 pled within-host and between-host dynamics and evolution of  
344 virulence, *Mathematical Biosciences* 270 (2015) 204–212, from  
345 Within-Host Dynamics to the Epidemiology of Infectious Disease.  
346 doi:<https://doi.org/10.1016/j.mbs.2015.02.012>.  
347 URL [https://www.sciencedirect.com/science/article/pii/  
348 S0025556415000553](https://www.sciencedirect.com/science/article/pii/S0025556415000553)
- 349 [8] H. Gulbudak, V. L. Cannataro, N. Tuncer, M. Martcheva, Vector-Borne  
350 Pathogen and Host Evolution in a Structured Immuno-Epidemiological  
351 System, *Bulletin of Mathematical Biology* 79 (2) (2017) 325–355. doi:  
352 [10.1007/s11538-016-0239-0](https://doi.org/10.1007/s11538-016-0239-0).  
353 URL <https://doi.org/10.1007/s11538-016-0239-0>
- 354 [9] M. Martcheva, N. Tuncer, Y. Kim, On the principle of host evolution  
355 in host–pathogen interactions, *Journal of Biological Dynamics* 11 (sup1)  
356 (2017) 102–119, PMID: 26998890. arXiv:[https://doi.org/10.1080/  
357 17513758.2016.1161089](https://doi.org/10.1080/17513758.2016.1161089), doi:[10.1080/17513758.2016.1161089](https://doi.org/10.1080/17513758.2016.1161089).  
358 URL <https://doi.org/10.1080/17513758.2016.1161089>
- 359 [10] R. M. Ribeiro, A. S. Perelson, The analysis of hiv dynamics using math-  
360 ematical models, *AIDS and Other Manifestations of HIV Infection* 905  
361 (2004) 912.

- 362 [11] I. of Medicine, Vector-Borne Diseases: Understanding the Environmental,  
363 Human Health, and Ecological Connections: Workshop Summary, The Na-  
364 tional Academies Press, Washington, DC, 2008. doi:10.17226/11950.
- 365 [12] S. Bhatt, P. W. Gething, O. J. Brady, J. P. Messina, A. W. Farlow, C. L.  
366 Moyes, J. M. Drake, J. S. Brownstein, A. G. Hoen, O. Sankoh, M. F.  
367 Myers, D. B. George, T. Jaenisch, G. R. W. Wint, C. P. Simmons, T. W.  
368 Scott, J. J. Farrar, S. I. Hay, The global distribution and burden of dengue,  
369 Nature 496 (7446) (2013) 504–507. doi:10.1038/nature12060.
- 370 [13] F. Beugnet, M. Jean-Lou, Emerging arthropod-borne diseases of compan-  
371 ion animals in Europe, Veterinary Parasitology 163 (4) (2009) 298–305.  
372 doi:10.1016/j.vetpar.2009.03.02.
- 373 [14] C. A. Hill, F. C. Kafatos, S. K. Stansfield, F. H. Collins, Arthropod-borne  
374 diseases: vector control in the genomics era, Nature Reviews Microbiology  
375 3 (3) (2005) 262–268. doi:10.1038/nrmicro1101.
- 376 [15] H. J. Bremermann, H. R. Thieme, A competitive exclusion principle for  
377 pathogen virulence, Journal of Mathematical Biology 27 (1989) 179–190.  
378 doi:10.1007/BF00276102.
- 379 [16] S. Lion, J. A. J. Metz, Beyond  $r_0$  maximisation: On pathogen evolution  
380 and environmental dimensions, Trends in Ecology and Evolution 33 (2018)  
381 458–473. doi:10.1016/j.tree.2018.02.004.
- 382 [17] B. Tesla, L. R. Demakovsky, H. S. Packiam, E. A. Mordecai, A. D.  
383 Rodríguez, M. H. Bonds, M. A. Brindley, C. C. Murdock, Estimating  
384 the effects of variation in viremia on mosquito susceptibility, infectious-  
385 ness, and  $r_0$  of zika in aedes aegypti, PLoS Neglected Tropical Diseases 12.  
386 doi:10.1371/journal.pntd.0006733.
- 387 [18] D. W. Vaughn, S. Green, S. Kalayanarooj, B. L. Innis, S. Nimmannitya,  
388 S. Suntayakorn, T. P. Endy, B. Raengsakulrach, A. L. Rothman, F. A. En-  
389 nis, A. Nisalak, Dengue Viremia Titer, Antibody Response Pattern, and

- 390 Virus Serotype Correlate with Disease Severity, *The Journal of Infectious*  
391 *Diseases* 181 (1) (2000) 2–9. arXiv:[https://academic.oup.com/jid/](https://academic.oup.com/jid/article-pdf/181/1/2/17994503/181-1-2.pdf)  
392 [article-pdf/181/1/2/17994503/181-1-2.pdf](https://academic.oup.com/jid/article-pdf/181/1/2/17994503/181-1-2.pdf), doi:10.1086/315215.  
393 URL <https://doi.org/10.1086/315215>
- 394 [19] N. Haider, Y.-M. Chang, M. Rahman, A. Zumla, R. A. Kock, Dengue  
395 outbreaks in bangladesh: Historic epidemic patterns suggest earlier  
396 mosquito control intervention in the transmission season could re-  
397 duce the monthly growth factor and extent of epidemics, *Current*  
398 *Research in Parasitology Vector-Borne Diseases* 1 (2021) 100063.  
399 doi:<https://doi.org/10.1016/j.crpvbd.2021.100063>.  
400 URL [https://www.sciencedirect.com/science/article/pii/](https://www.sciencedirect.com/science/article/pii/S2667114X21000571)  
401 [S2667114X21000571](https://www.sciencedirect.com/science/article/pii/S2667114X21000571)
- 402 [20] R. Ben-Shachar, K. Koelle, Transmission-clearance trade-offs indicate that  
403 dengue virulence evolution depends on epidemiological context, *Nature*  
404 *Communications* 9. doi:10.1038/s41467-018-04595-w.
- 405 [21] N. J. White, Malaria parasite clearance, *Malaria Journal* 16. doi:10.1186/  
406 [s12936-017-1731-1](https://doi.org/10.1186/s12936-017-1731-1).
- 407 [22] J. M. Mansuy, C. Mengelle, C. Pasquier, S. Chapuy-Regaud, P. Delobel,  
408 G. Martin-Blondel, J. Izopet, Zika Virus Infection and Prolonged Viremia  
409 in Whole-Blood Specimens, *Emerging Infectious Diseases* 23 (5) (2017)  
410 863–865. doi:10.3201/eid2305.161631.  
411 URL [http://wwwnc.cdc.gov/eid/article/23/5/16-1631\\_article.htm](http://wwwnc.cdc.gov/eid/article/23/5/16-1631_article.htm)
- 412 [23] C. Triplett, S. Dufek, N. Niemuth, D. Kobs, C. Cirimotich, K. Mack,  
413 D. Sanford, Onset and Progression of Infection Based on Viral Loads in  
414 Rhesus Macaques Exposed to Zika Virus, *Applied Microbiology* 2 (3) (2022)  
415 544–553. doi:10.3390/applmicrobiol2030042.  
416 URL <https://www.mdpi.com/2673-8007/2/3/42>
- 417 [24] Y. M. Tun, P. Charunwatthana, C. Duangdee, J. Satayarak, S. Suthisawat,  
418 O. Likhit, D. Lakhota, N. Kosoltanapiwat, P. Sukphopetch, K. Boonnak,

419 Virological, Serological and Clinical Analysis of Chikungunya Virus Infec-  
420 tion in Thai Patients, *Viruses* 14 (8) (2022) 1805. doi:10.3390/v14081805.  
421 URL <https://www.mdpi.com/1999-4915/14/8/1805>



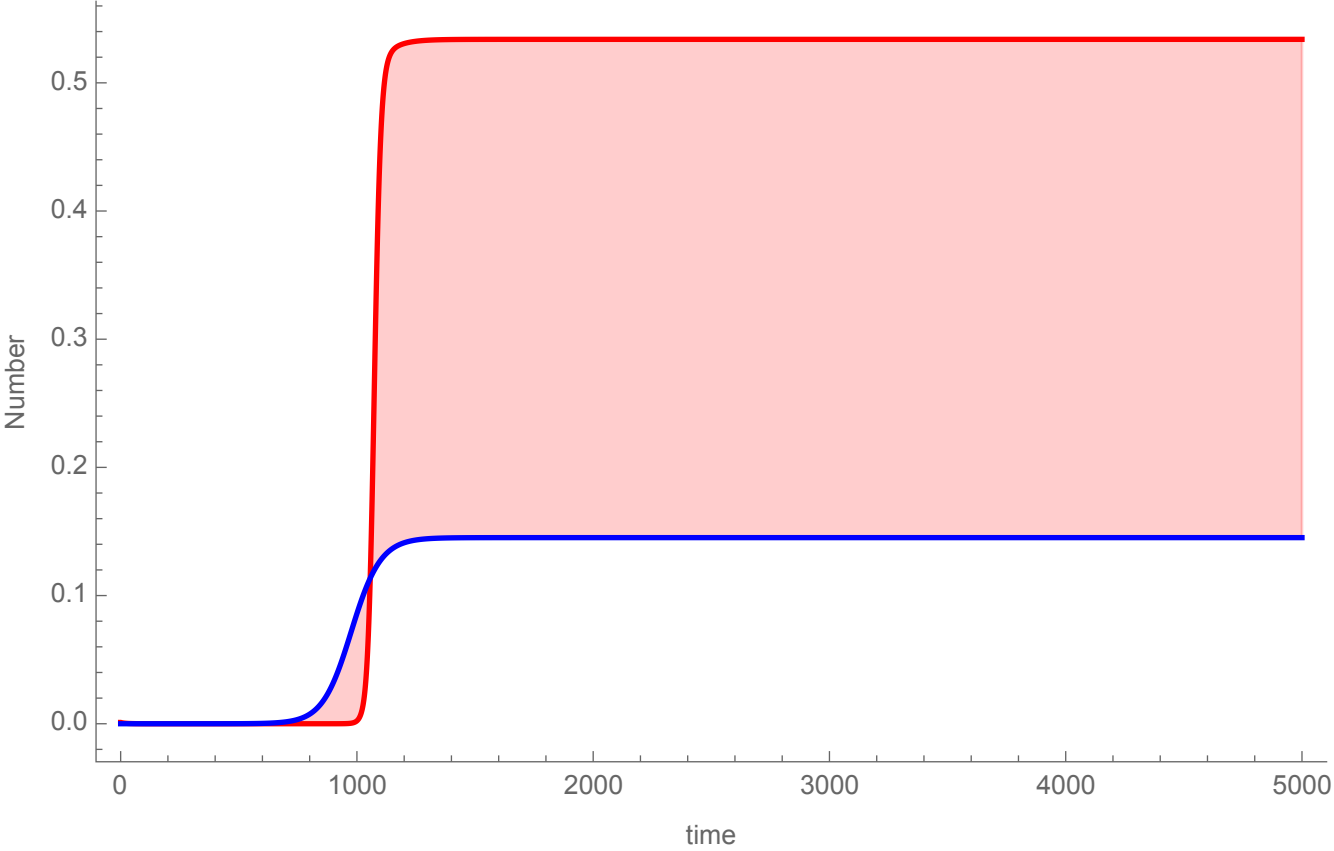

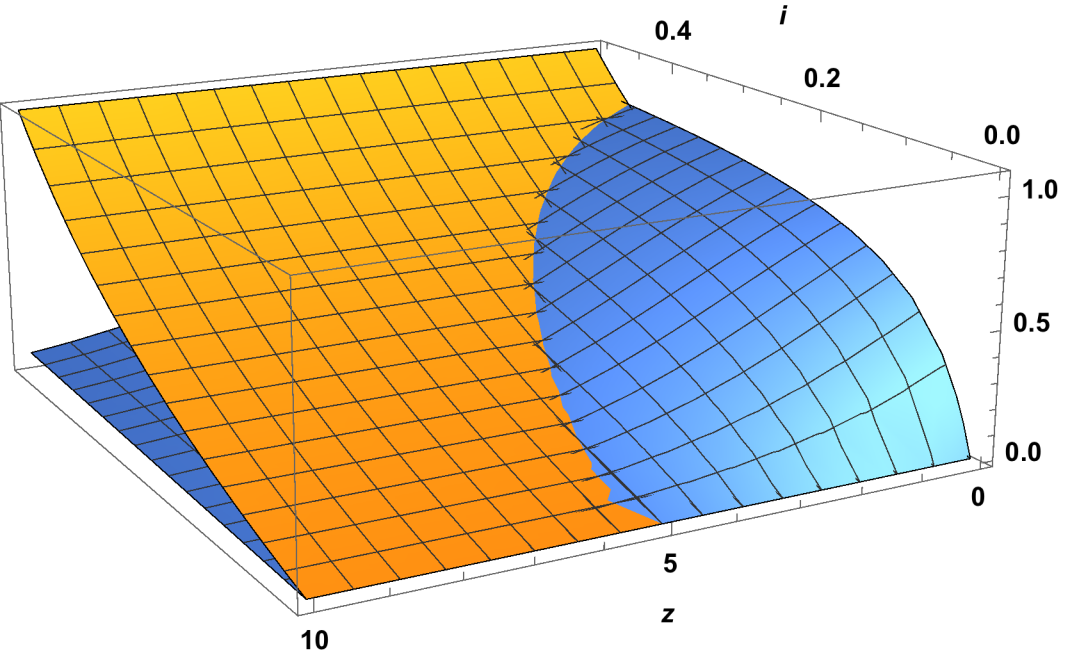

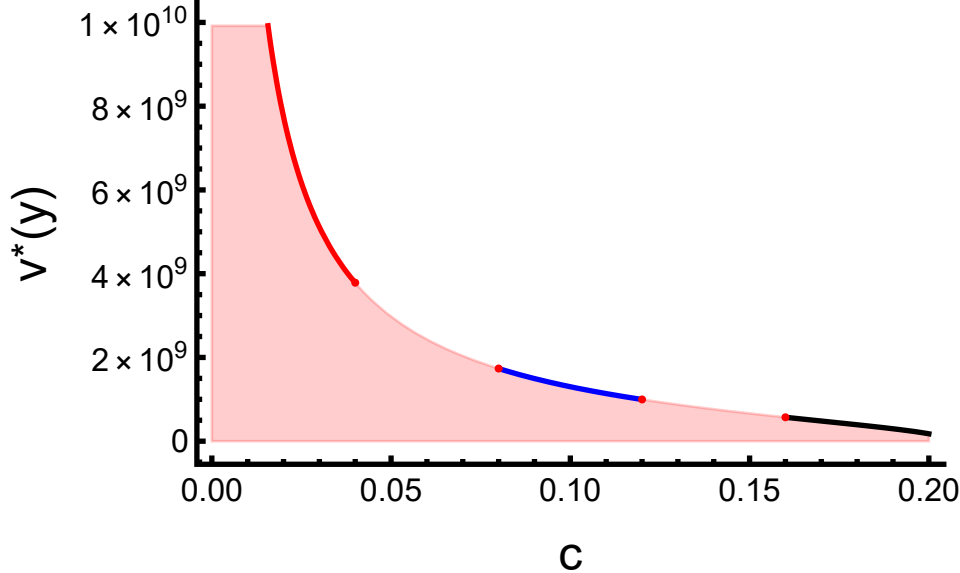

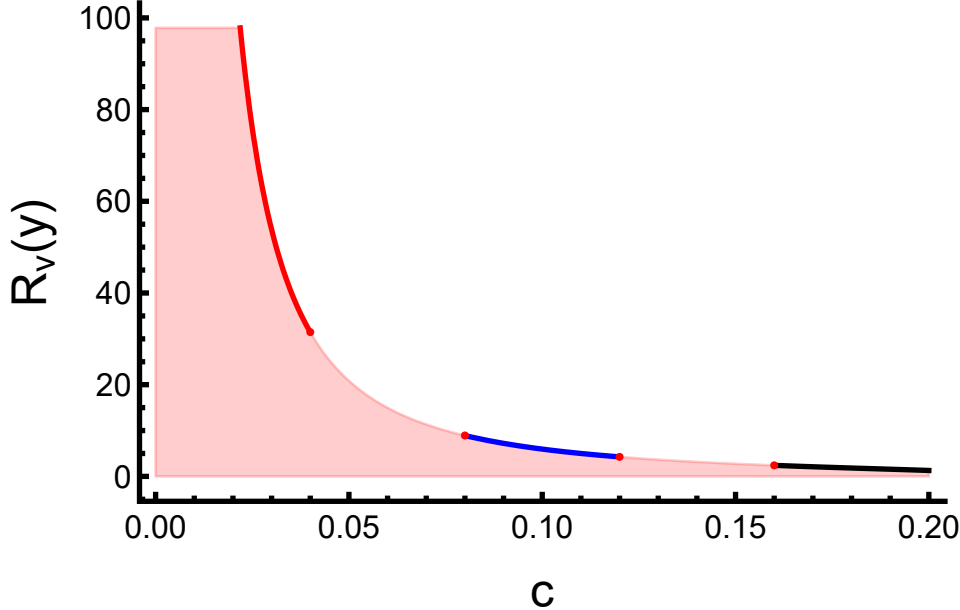

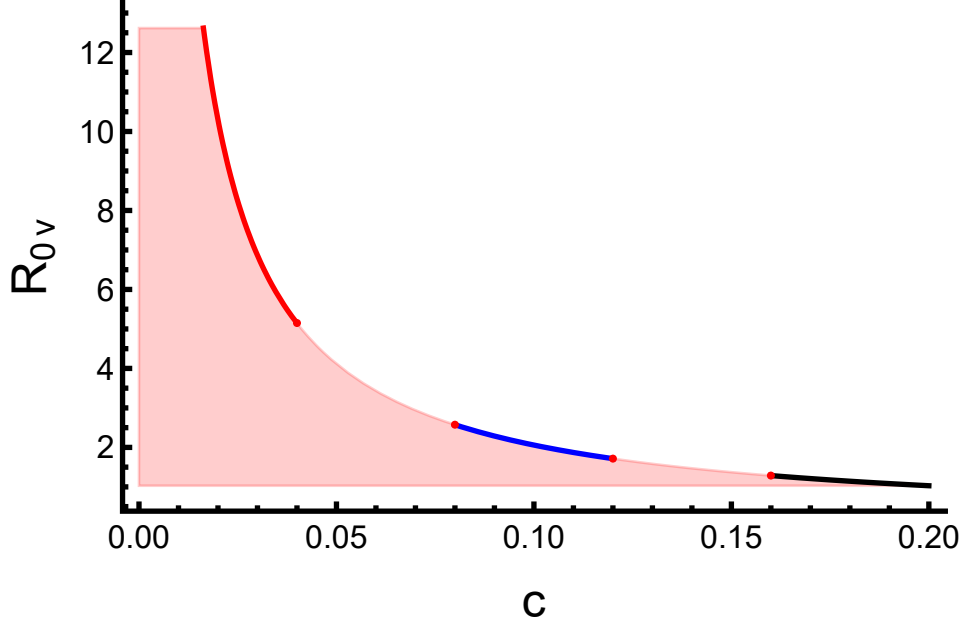

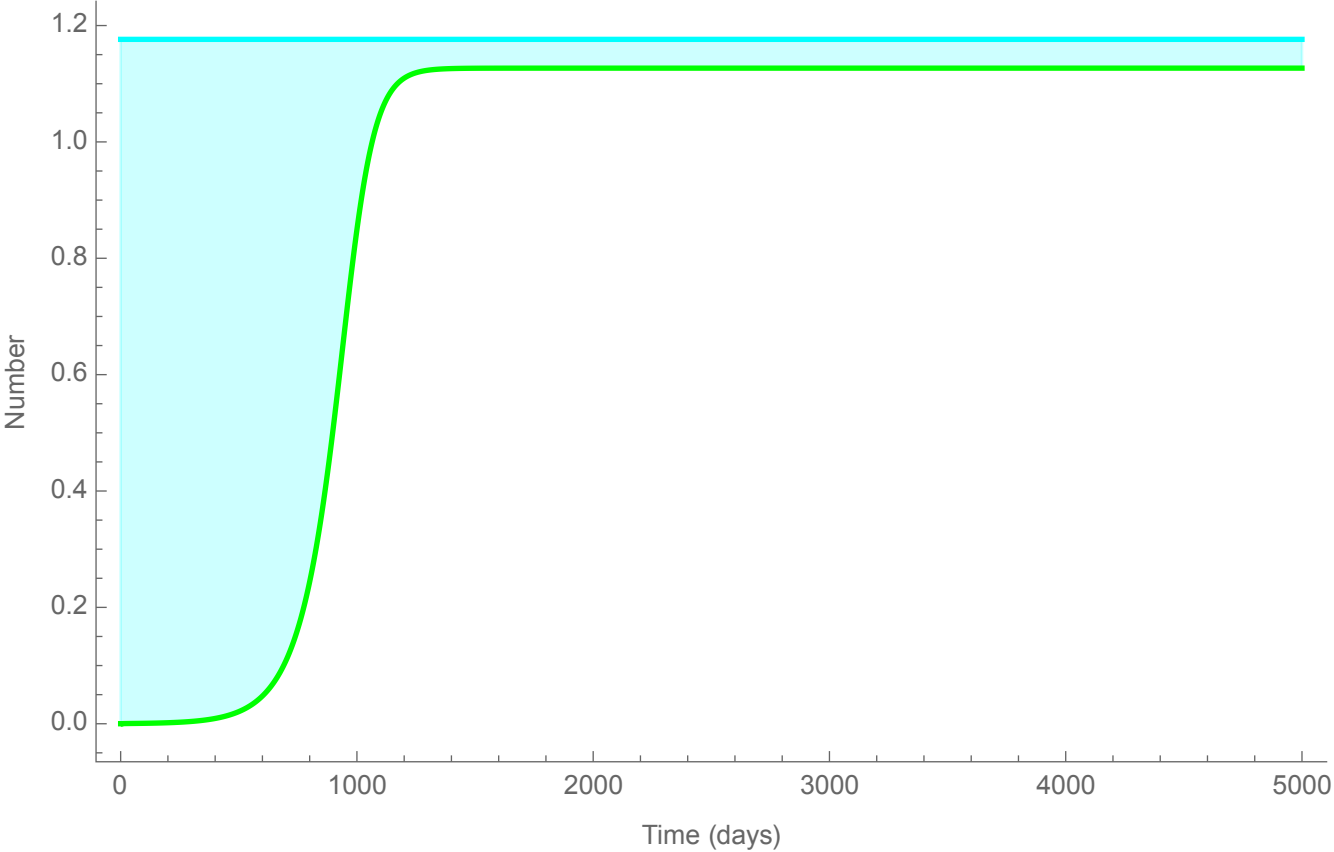

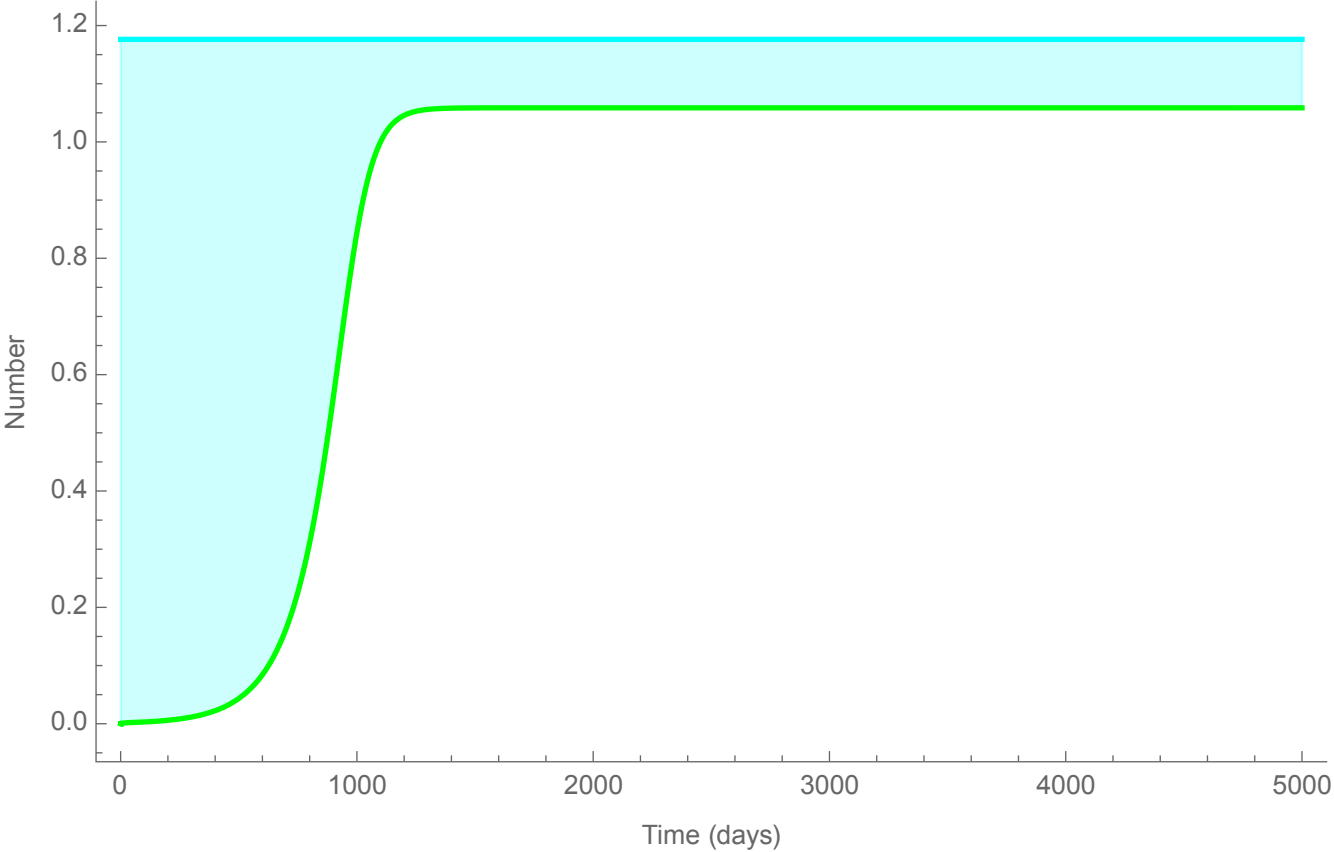

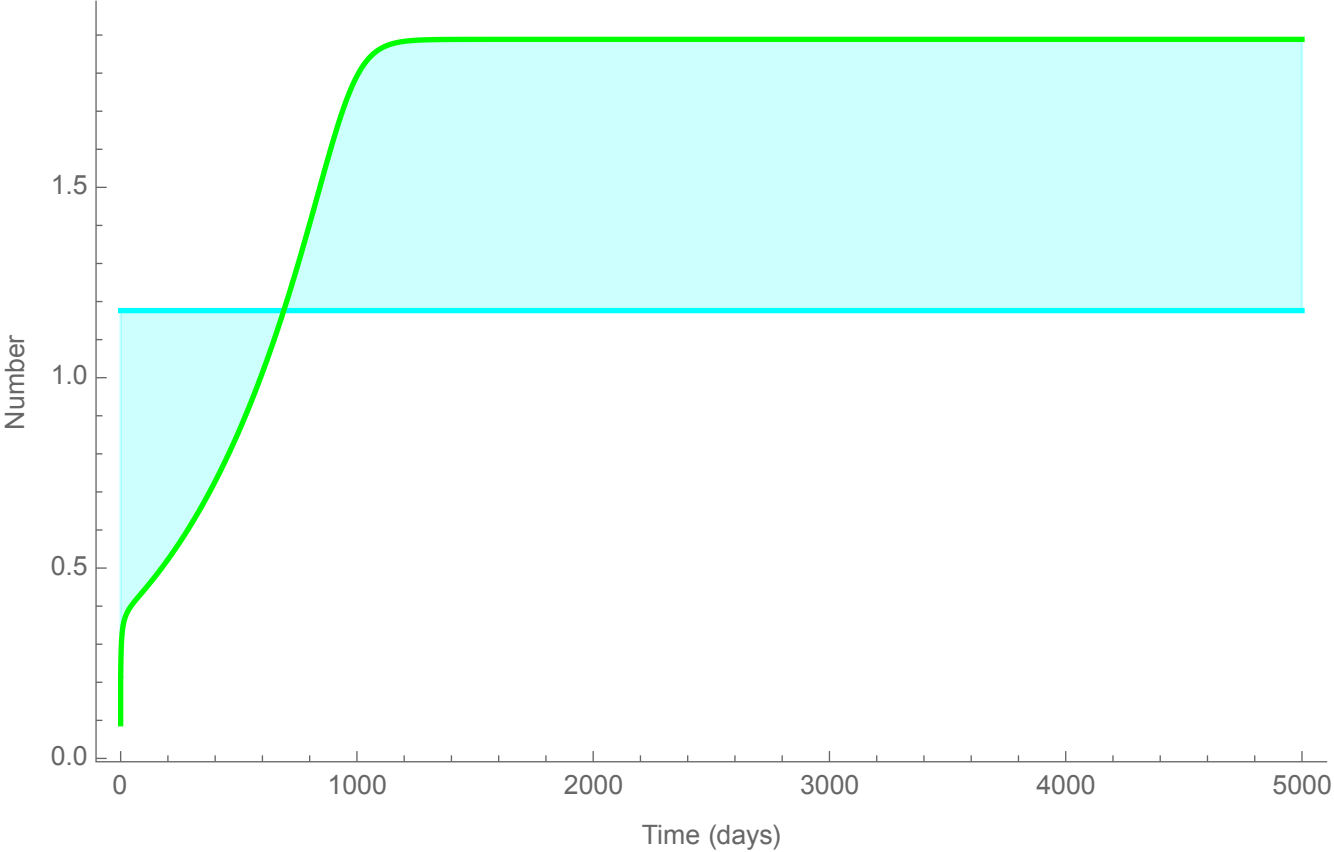



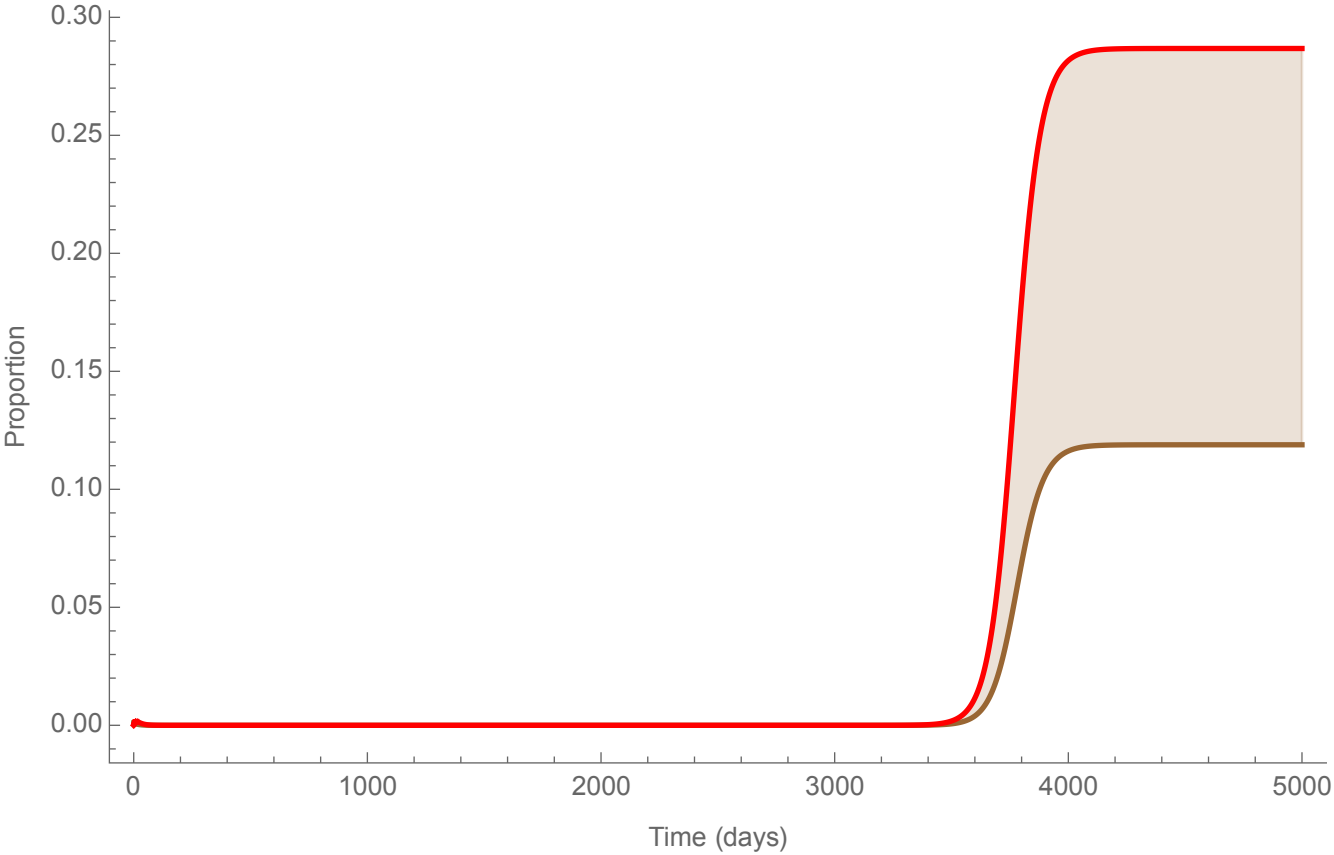

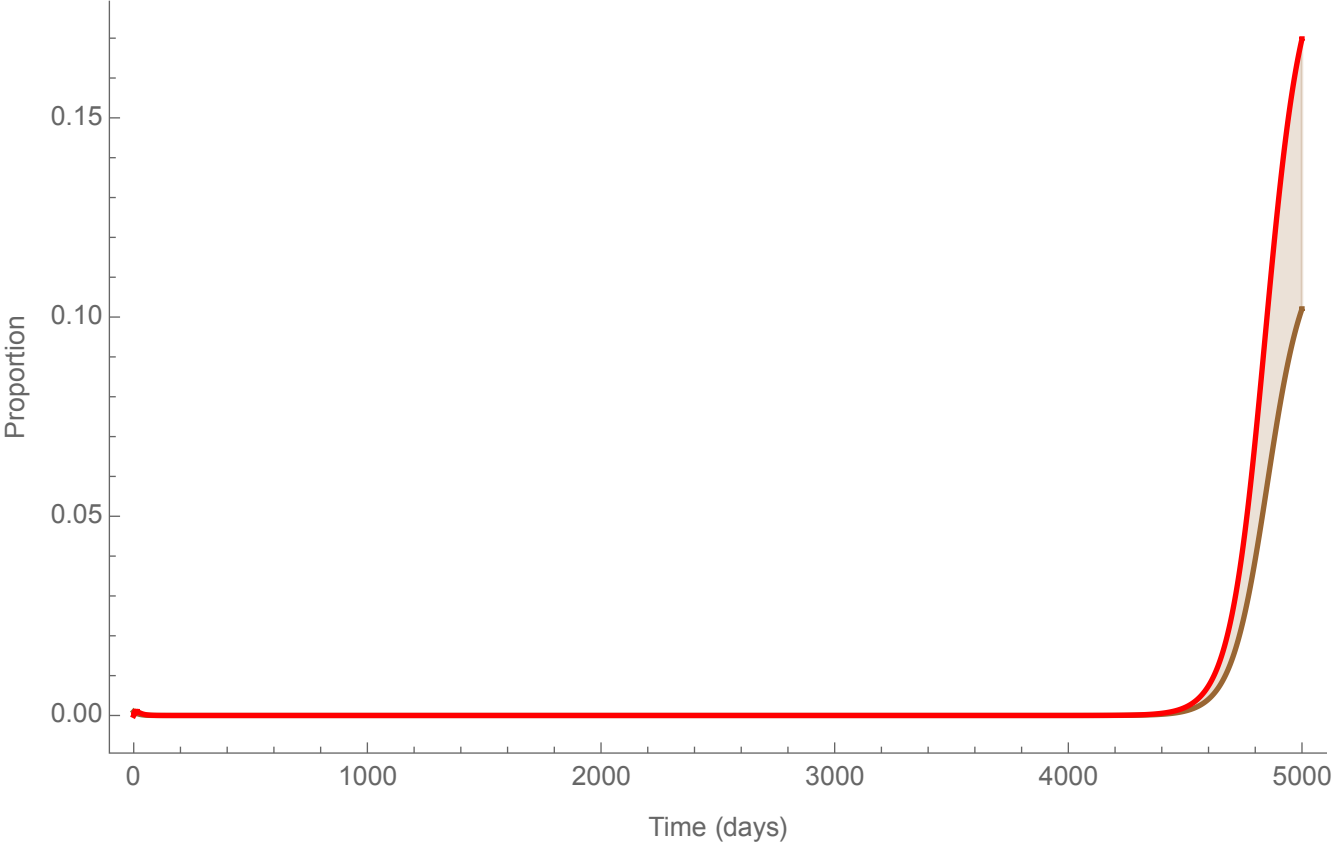

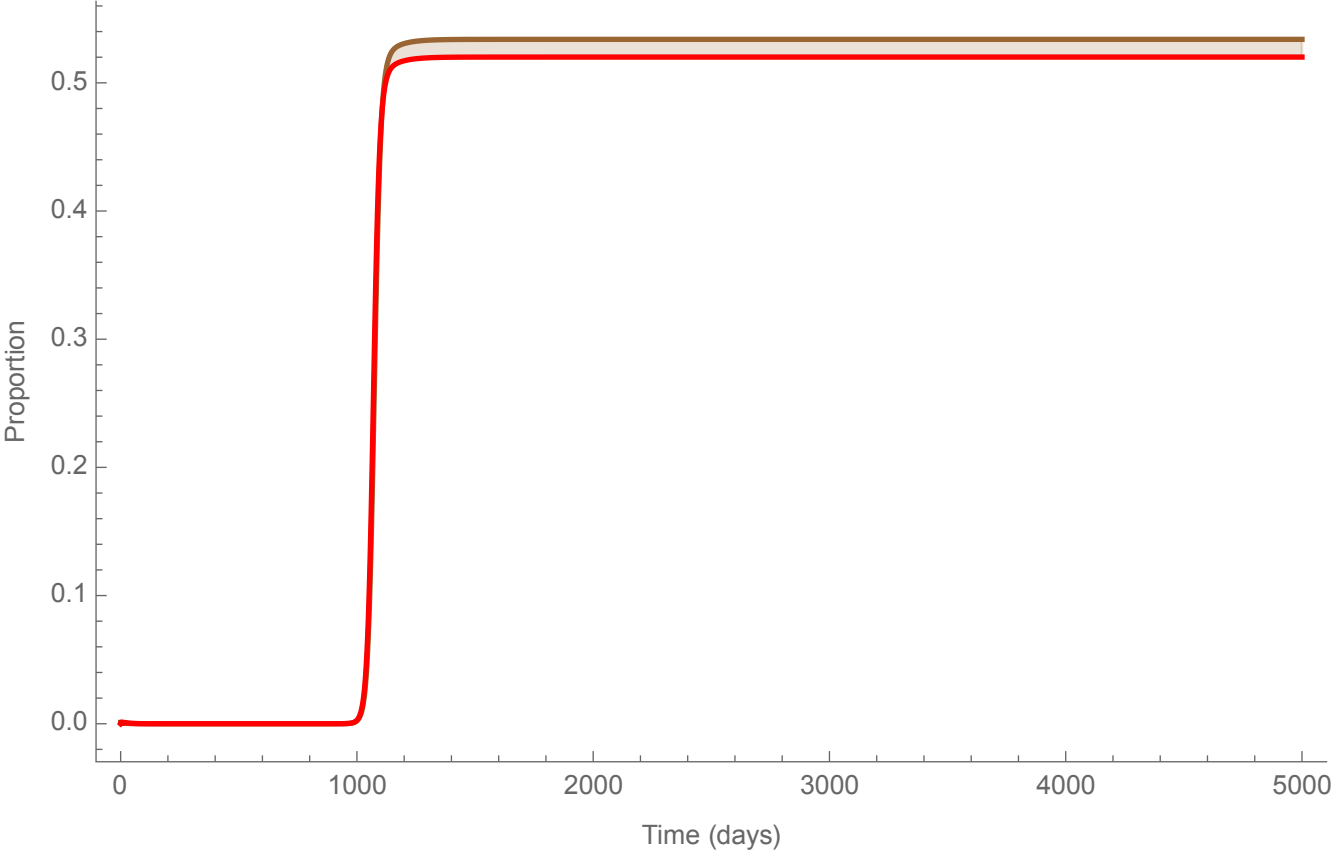

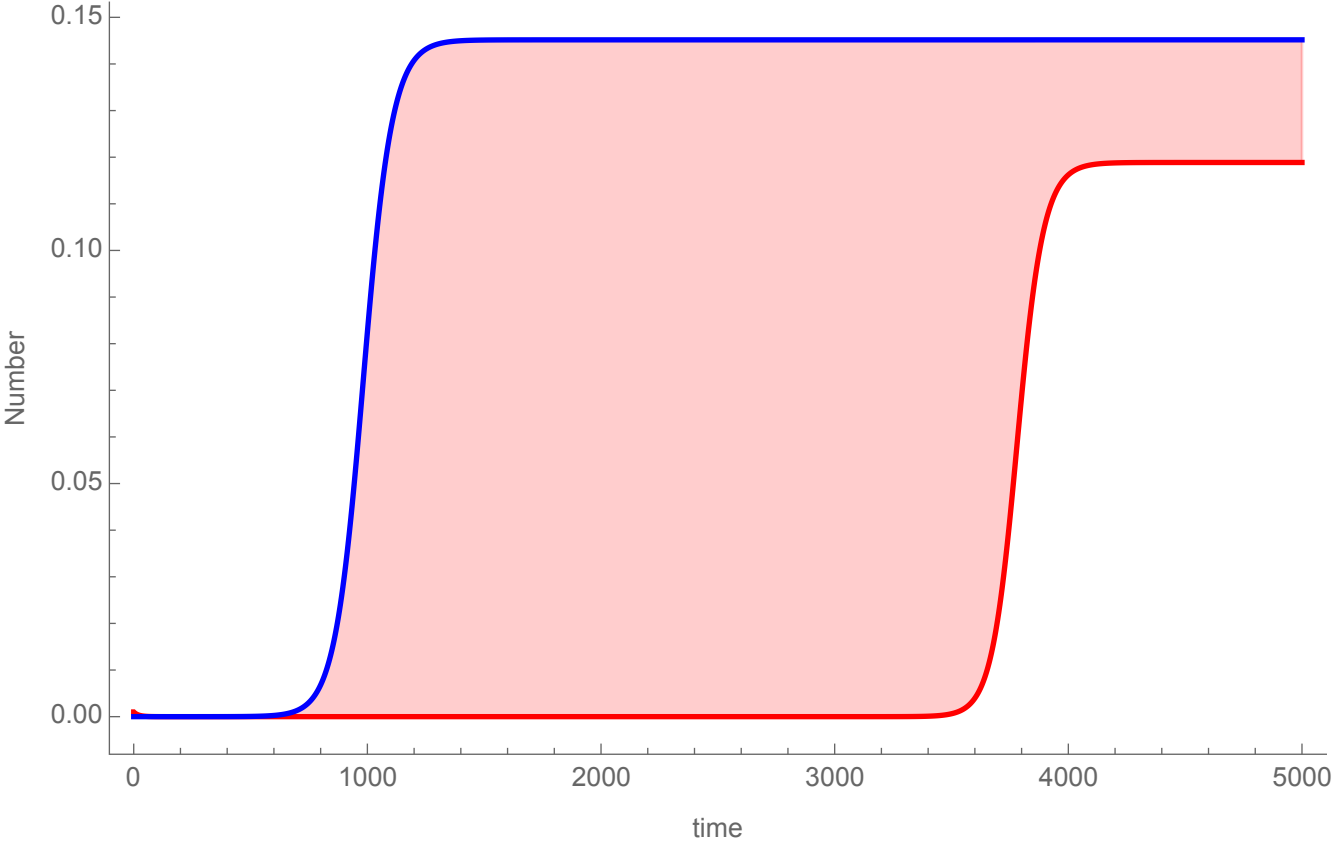

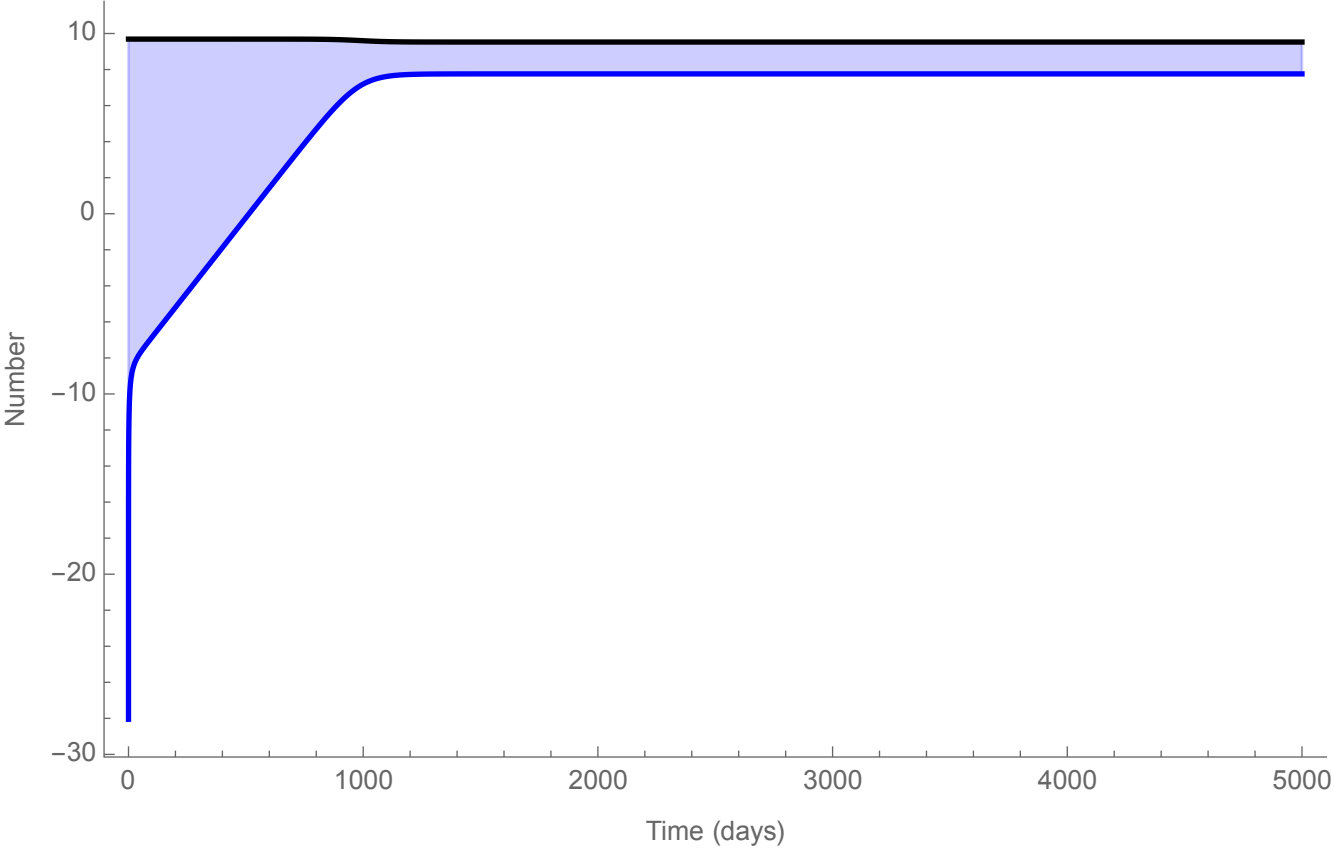

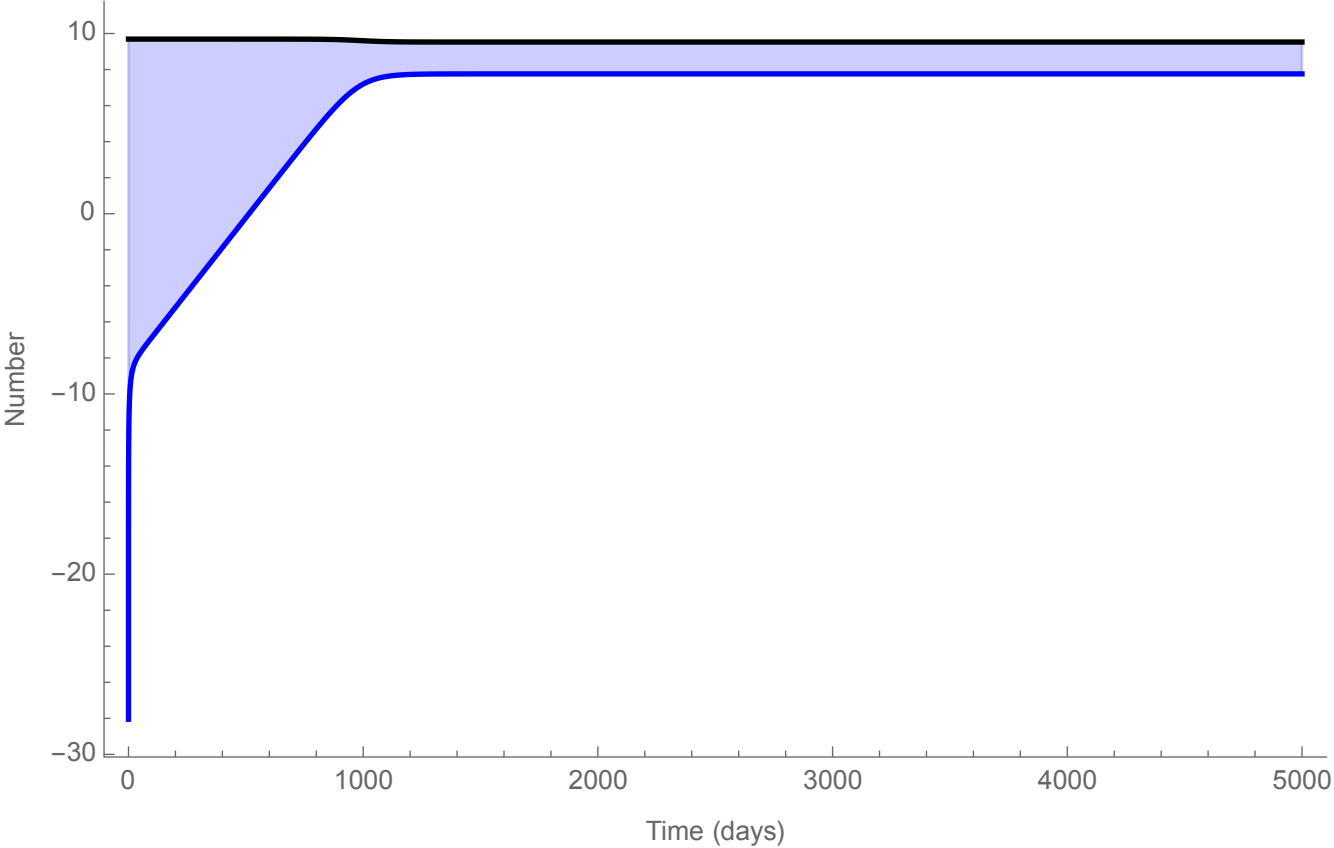

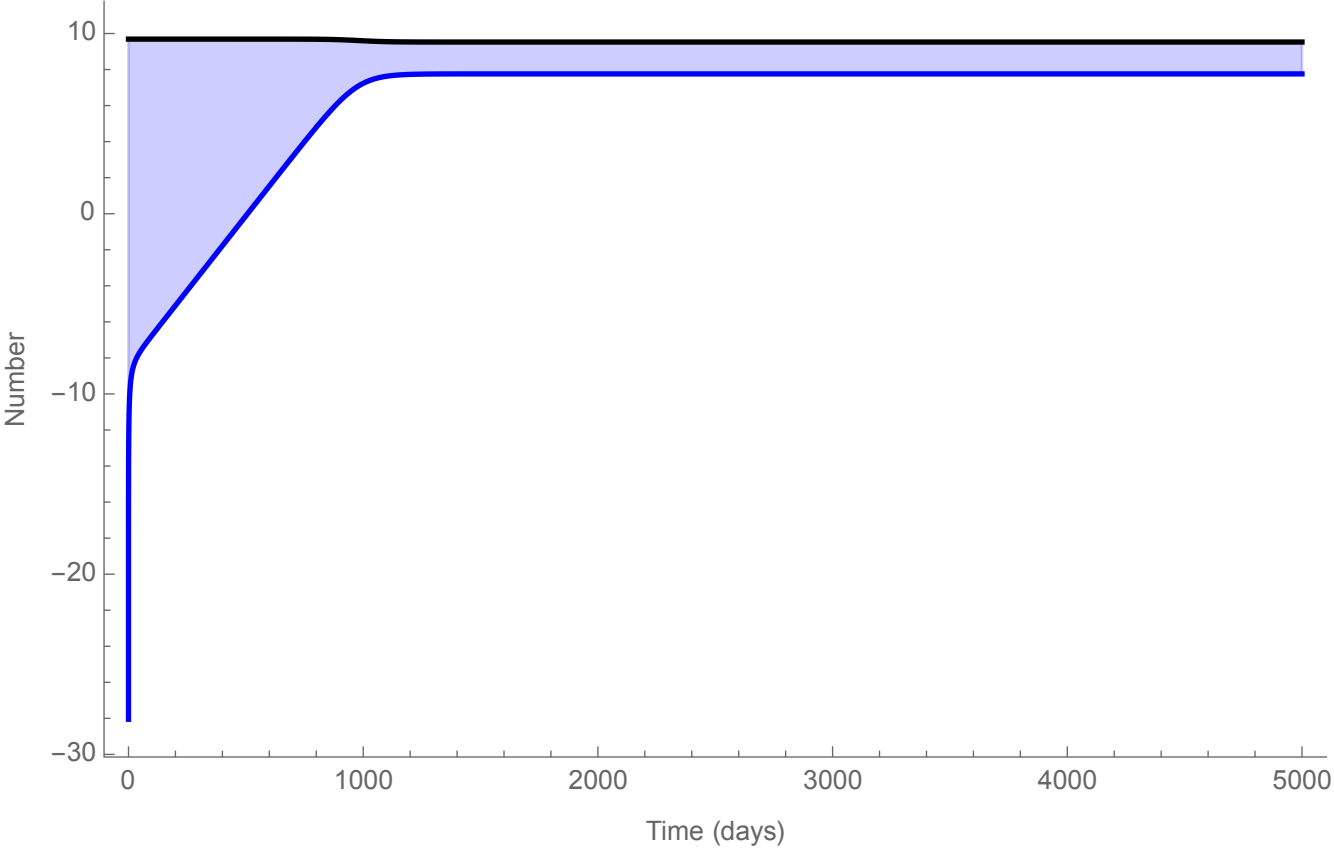

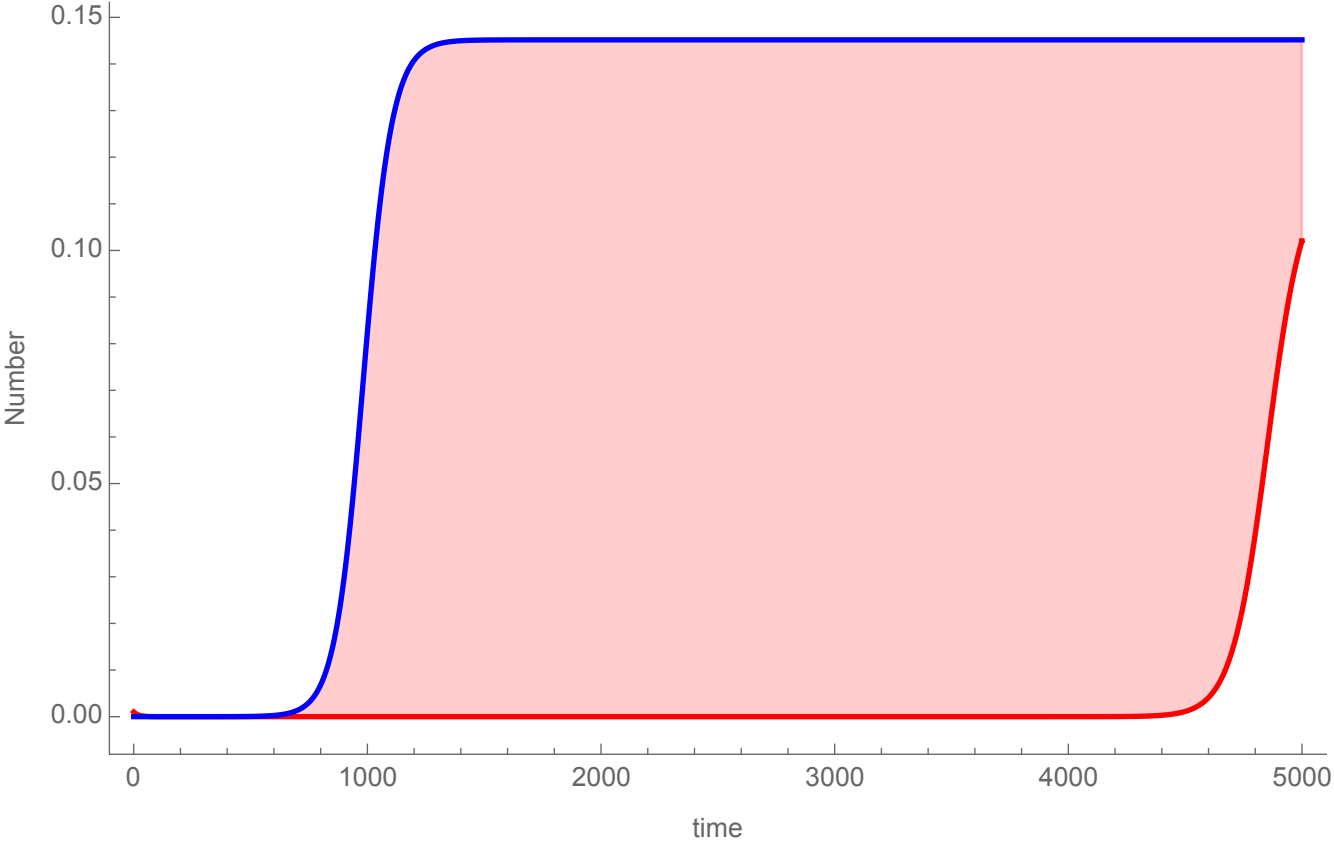



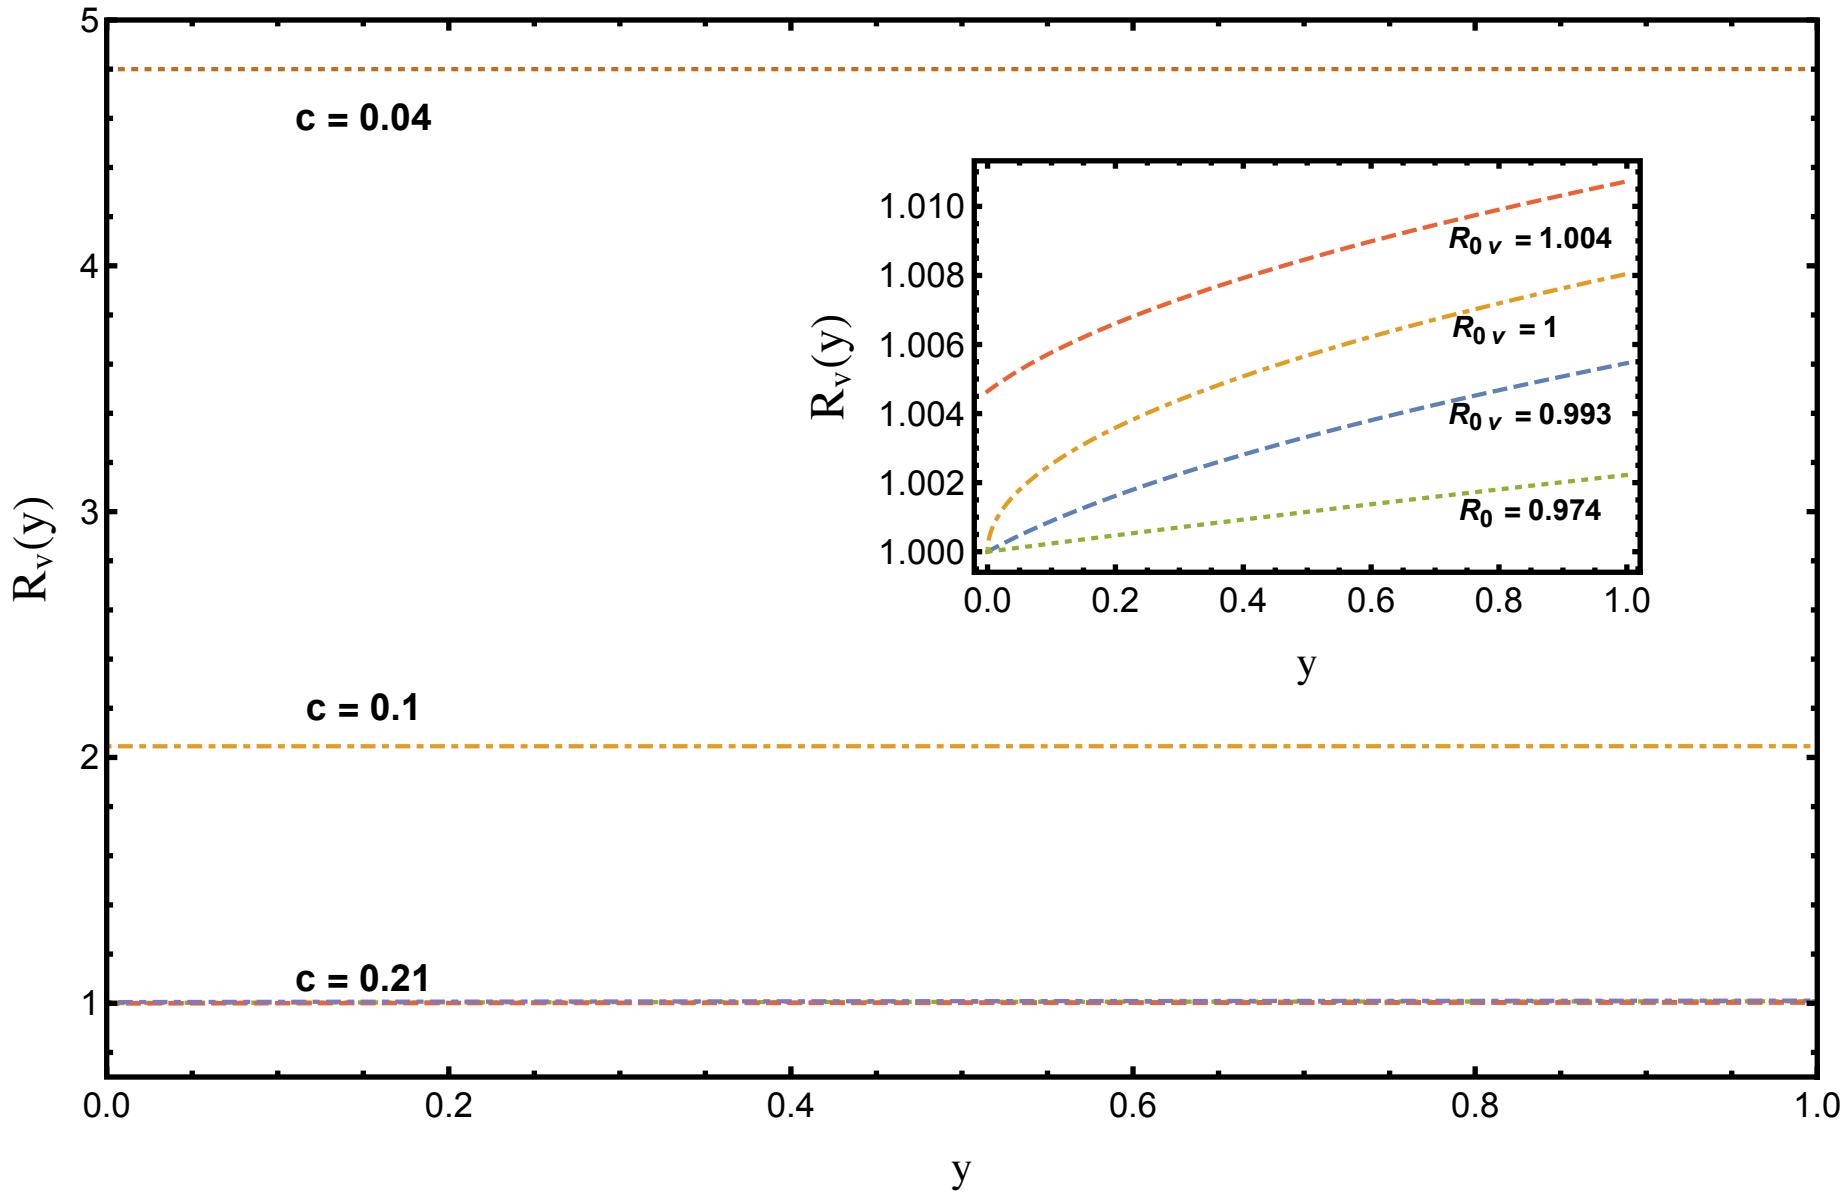

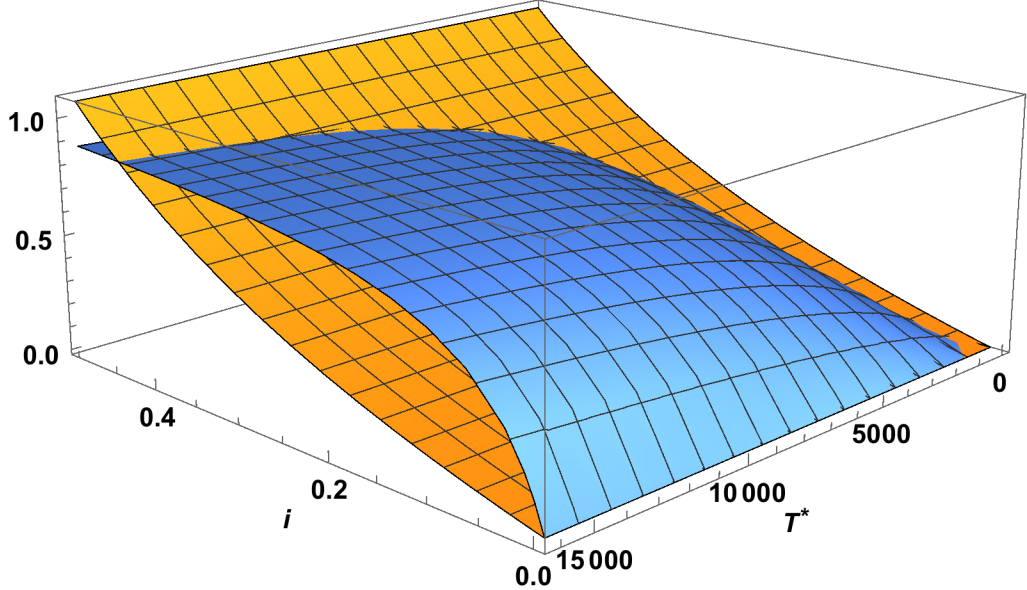

Source: https://www.biorxiv.org/content/10.1101/2022.11.28.518273v1.full.pdf
